1 **Abstract**

2 **Background:** A mutation in the *C9orf72* gene is the most common genetic mutation of familial  
3 and sporadic ALS, as well as familial FTD. While prior studies have focused on elucidating the  
4 mechanisms of neuronal dysfunction and neurodegeneration associated with this genetic  
5 mutation, the contribution of microglia to disease pathogenesis in the ALS/FTD disease  
6 spectrum remains poorly understood.

7 **Methods:** Here, we generated a new disease model consisting of cultured *C9orf72* ALS/FTD  
8 patient-derived induced pluripotent stem cells differentiated into microglia (iPSC-MG). We used  
9 this model to study the intrinsic cellular and molecular phenotypes of microglia triggered by the  
10 *C9orf72* gene mutation.

11 **Results:** We show that *C9orf72* ALS/FTD iPSC-MG have a similar transcriptional profile  
12 compared to control iPSC-MG, despite the presence of *C9orf72*-associated phenotypes  
13 including reduced *C9orf72* protein levels and dipeptide-repeat protein translation. Interestingly,  
14 *C9orf72* ALS/FTD iPSC-MG exhibit intrinsic dysfunction of phagocytic activity upon exposure to  
15 A $\beta$  or brain synaptoneurosomes and display a heightened inflammatory response. Detailed  
16 analysis of the endosomal and lysosomal pathways revealed altered expression of endosomal  
17 marker early endosome antigen 1 and lysosomal associated membrane protein 1 in *C9orf72*  
18 ALS/FTD iPSC-MG, which was confirmed in patient postmortem tissues.

19 **Conclusions:** These findings demonstrate that unstimulated *C9orf72* iPSC-MG mono-cultures  
20 share a largely similar transcriptome profile with control microglia, despite the presence of  
21 *C9orf72* disease phenotypes. The dysfunction of the endosomal-lysosomal pathway as  
22 demonstrated by aberrant microglia phagocytosis and engulfment of cellular debris and brain

1 pathogens suggests that disease-related microglia phenotypes are not intrinsic but instead  
2 require microglia to be activated. In summary, the *C9orf72* iPSC-MG culture system provides a  
3 novel human disease model to study the role of microglia in *C9orf72* ALS/FTD disease  
4 pathogenesis.

5

## 6 **Keywords**

7 *C9orf72*, Amyotrophic Lateral Sclerosis, Frontotemporal Dementia, iPSC, iPSC-microglia,  
8 neuroinflammation, microglia, lysosome, endosome

9

## 10 **Background**

11 The GGGGCC hexanucleotide repeat expansion (HRE) in the non-coding region of the  
12 *chromosome 9 open reading frame 72 (C9orf72)* gene is considered the most prevalent genetic  
13 abnormality associated with amyotrophic lateral sclerosis/frontotemporal dementia (ALS/FTD)  
14 to date (1, 2). The *C9orf72* HRE has been hypothesized to contribute to neurodegeneration  
15 through three non-mutually exclusive mechanisms. First, *C9orf72* HRE leads to  
16 haploinsufficiency and reduced *C9orf72* protein expression due to a failure in transcription of the  
17 expanded allele; second, non-canonical translation of the repeat RNA leads to synthesis of  
18 dipeptide repeat (DPR) proteins; third, RNA toxicity via sequestration of RNA binding proteins to  
19 GGGGCC RNA foci. Additionally, *C9orf72* postmortem tissues exhibit TAR-DNA binding protein  
20 43 (TDP-43) pathology, which is characterized by nuclear depletion of TDP-43 and cytoplasmic  
21 inclusions, and which is described not only in ALS and FTD, but also in other neurodegenerative  
22 diseases, including Alzheimer's disease (AD) and related dementias (3-8).

1 While neuronal degeneration is a hallmark of ALS and FTD, it is well known that central nervous  
2 system (CNS) glia can impact the onset and progression of diseases via non-cell autonomous  
3 disease mechanisms (9-16). Microglia are the innate immune cells of the CNS responsible for  
4 removing brain pathogens and injury-related debris and are essential to brain development,  
5 homeostasis, ageing and disease (17-23). Despite recent investigations, the role of microglia in  
6 *C9orf72* ALS/FTD remains poorly understood (24-27). Initial studies using *C9orf72* ALS/FTD  
7 postmortem brain tissues revealed more extensive microglia pathology in the corticospinal tract  
8 compared to non-*C9orf72* ALS patients (28). The same group also found that microglia activation  
9 was significantly higher in ALS patients with dementia or impaired executive function, suggesting  
10 that microglia activation correlates with FTD-like symptoms (29). Additional studies reported  
11 enlarged lysosomes in microglia in the motor cortex and spinal cord of *C9orf72* ALS patients  
12 compared to sporadic ALS (sALS) patients (30). Examination of microglia in postmortem brain  
13 tissues from patients with frontotemporal lobar degeneration revealed that microglia dysfunction  
14 differed between patients with a *C9orf72* repeat expansion and patients with a mutation in  
15 progranulin, the latter accounting for 5-25% of familial FTD (31, 32). This suggests that the  
16 specificity of microglia dysfunction depends on the etiology of the patient population, and further  
17 emphasizes the need to better understand how microglia contribute to ALS and FTD. With  
18 respect to *C9orf72* ALS/FTD, it is notable that hallmark neuropathological features are most  
19 prominent in neurons compared to neighboring microglia (25, 33). However, no studies have  
20 addressed whether microglia dysfunction and the aberrant phenotypes they develop are intrinsic  
21 or evoked by a diseased cellular environment. It is also unknown whether microglia exhibit non-  
22 cell autonomous regulatory activities similar to what has been described for astrocytes and their  
23 ability to trigger motor neuron degeneration in ALS (9, 10, 34, 35).

1 Although several mouse models for *C9orf72* ALS/FTD have been generated, very little attention  
2 has been given to the specific role of microglia (36). While these mouse models display general  
3 microglia activation, the precise contribution of microglia to the observed phenotypes and  
4 pathologies remains unknown. Perhaps the most significant microglia phenotypes were  
5 observed in *C9orf72* knockout mice, which displayed signs of neuroinflammation and where  
6 microglia exhibited lysosomal accumulation and increased expression of pro-inflammatory  
7 cytokines including IL-6 and IL-1 $\beta$  (30, 37, 38). Furthermore, transcriptomic profiling revealed an  
8 upregulation of inflammatory pathways similar to what has been found in *C9orf72* FTD patient  
9 tissues (30, 39). Similarly, knocking out *C9orf72* with antisense oligonucleotides in mice led to  
10 the upregulation of *TREM2* and *C1qa*, which are both upregulated in activated microglia (40). In  
11 addition, a recent study showed that antibodies against one of the *C9orf72* DPR proteins, poly-  
12 (GA), reduced neuroinflammation in a poly-(GA) overexpressing mouse model (41). While  
13 limited, these *in vivo* studies support a role for microglia in *C9orf72* ALS/FTD pathogenesis.  
14 In an effort to understand the contribution of non-neuronal cells to *C9orf72* ALS/FTD, we  
15 generated a human *in vitro* cell culture model by differentiating *C9orf72* ALS/FTD patient derived  
16 induced pluripotent stem cell (iPSCs) into microglia. While the use of a human iPSC-microglia  
17 (iPSC-MG) culture technique has only recently been developed, several studies have  
18 implemented this technology to study the role of microglia in neurodegenerative diseases, in  
19 particular Alzheimer's disease (42-48). To our knowledge, the intrinsic properties of microglia  
20 carrying a *C9orf72* HRE, and their role in *C9orf72* ALS/FTD neurodegeneration, have yet to be  
21 examined. Evaluations of human microglia seem particularly important since comprehensive  
22 studies on microglia single-cell expression patterns found that, while there is an evolutionary  
23 conserved gene core program, notable differences were uniquely found in primate microglia,

1 including complement, phagocytic and susceptibility genes to neurodegenerative diseases (49).  
2 This is supported by additional studies looking at human specific microglial gene expression  
3 changes in AD and Parkinson's disease (50-52).  
4 Here, we generated iPSC-MG mono-cultures that express known microglia genes and proteins.  
5 These iPSC-MG also perform common microglia functions such as phagocytosis and the release  
6 of cytokines and chemokines upon exposure to extracellular stimuli. iPSC-MG generated from  
7 *C9orf72* ALS/FTD patients recapitulate aspects of *C9orf72* ALS/FTD pathology, but present with  
8 a virtually unaltered gene expression profile compared to control iPSC-MG based on RNA  
9 sequencing analyses. Nevertheless, *C9orf72* ALS/FTD iPSC-MG exhibit an altered  
10 inflammatory phenotype upon stimulation with lipopolysaccharide (LPS), and aberrant lysosomal  
11 accumulation following the phagocytosis of A $\beta$  (1-40)-TAMRA protein or human brain  
12 synaptoneuroosomes. These inflammatory phenotypes are accompanied by aberrant protein  
13 expression of early endosome antigen 1 (EEA1) and lysosomal associated membrane protein 1  
14 (Lamp1). Of importance, microglia endosomal-lysosomal pathway dysfunction was similarly  
15 observed in the frontal cortex and motor cortex of *C9orf72* ALS/FTD patients. These studies  
16 provide the first thorough characterization of *C9orf72* ALS/FTD iPSC-MG mono-cultures and  
17 their intrinsic properties. These data further suggest that either or both a diseased environment  
18 and extracellular stimuli are critical to activate microglia and to initiate the disease-specific  
19 microglia phenotypes observed in postmortem patient brain tissues.

20

## 21 **Methods**

### 22 **Generation of Hematopoietic Progenitor Cells (HPCs) DIV -1 to DIV 12**

1 IPSCs were differentiated into microglia following an established protocol (53). Briefly, iPSCs  
2 were maintained in mTeSR Plus Kit (Stemcell Technologies # 05825) in 10cm dishes. At DIV -  
3 1 of HPCs differentiation, five to seven day old iPSCs cultures were then used to generate cluster  
4 of differentiating 43 positive (CD43<sup>+</sup>) hematopoietic progenitor cells (HPCs) following a 12 day  
5 commercially available kit (STEMdiff Hematopoietic Kit; Stemcell Technologies # 05310). IPSCs  
6 were cleaned and 1/3 dish was gently dissociated with dispase (Stemcell Technologies # 07923)  
7 for 12-15 minutes at 37°C. IPSCs were then collected and spun down at 500rpm for 1-2 minutes  
8 and resuspended in 2mL of mTeSR Plus media with 20  $\mu$ M ROCK inhibitor Y-27632 (Stemcell  
9 Technologies # 72304). Matrigel, hESC-Qualified Matrix (Corning # 354277) coated six well  
10 plates containing 2mL/well of mTeSR Plus media with 20  $\mu$ M ROCK were used to start the HPC  
11 differentiation. Using a 5mL serological pipette, one drop or two drops of iPSCs were seeded  
12 per well. Then, next day, on DIV 0 of HPCs differentiation, wells with 80 small colonies per well  
13 were selected to start HPCs differentiation. IPSCs were fed following the manufacturer's  
14 instructions. On DIV 12 of HPCs differentiation, only the non-adherent HPCs were transferred  
15 to a new six well plate to start microglia differentiation (DIV 12/0).

16  
17 **Differentiation of HPCs into microglia cells DIV 12/0 – DIV 40/28**  
18 Matrigel, GFR (growth factor reduced) Membrane Matrix (Corning # 356231) coated six well  
19 plates were prepared to start microglia differentiation (DIV12/0). HPCs were differentiated into  
20 microglia for 28 days using serum free media conditions. HPCs in suspension were collected  
21 and spun down at 300 xG for 6 minutes and resuspended into microglia basal media (MBM,  
22 2mL/well) containing: DMEM/F12 no phenol (Gibco # 11-039-021), 2% Insulin Transferin

1 Selenite (Gibco # 41400045), 2% B27 (Gibco # 17504-044), 0.5% N2 (Gibco # 17502-048), 1%  
2 Glutamax (Gibco # 35050-061), 1% NEAA (Gibco # 11140-050), 1% Pen/Strep (Gibco # 15140-  
3 122), 400 $\mu$ M 1-Thioglycerol (Sigma # M1753), 5 $\mu$ g/mL human insulin (Sigma # I2643) and  
4 supplemented with 3 growth factors (GFs): 100ng/mL human recombinant interleukin-34 (IL-34;  
5 Peprotech # 200-34), 25ng/mL macrophage colony-stimulating factor (M-CSF; Gibco #  
6 PHC9501) and 50ng/mL transforming growth factor  $\beta$ 1 (TGF $\beta$ 1; Miltenyi Biotec # 130-108-969)  
7 (MBM + 3GFs); cytokines and growth factors known to be essential for the development of  
8 microglia (54-61). Microglia differentiation starts (DIV 12/0) once the HPCs are transferred and  
9 plated at a density of 200 000 cells per well of a six well. Cells will predominantly grow in  
10 suspension. On DIV 2, 4, 6, 8 and 10 of microglia differentiation, 1mL of MBM + 3GFs media  
11 was added to each well. On DIV 12, a partial media change was done. IPSC-MGs from one six  
12 well plate were spun down at 300 xG for 6 minutes and resuspended into MBM + 3 GFs and  
13 split back into the same six well plate. On DIV 14, 16, 18, 20, 22, 24, 1mL media was added per  
14 well. On DIV 25, MBM + 3GFs was changed to maturation media composed of MBM  
15 supplemented with the 5 growth factors (MBM +5 GFs): 100ng/mL IL34, 25ng/mL M-CSF and  
16 50ng/ml TGF $\beta$ 1, 100ng/mL cluster of differentiation 200 (CD200; Novoprotein # C31150UG)  
17 and 100ng/mL fractaline chemokine C-X3-C motif ligand 1 (CX3CL1; Peprotech # 300-31)  
18 (MBM + 5 GFs). The presence of CD200 and CX3CL1 in the culture media, both glial and  
19 neuronal molecules are critical for microglia maturation and maintenance of an *in vivo*-like  
20 microglia resting state phenotype in an *in vitro* setting (62-64) (Fig. 1a). At DIV 28, IPSC-MG  
21 reached maturation. 1mL of MBM + 5GFs media was added to the cultures every other day.  
22 Mature cells were used for experimentation within 10 days (DIV 28-DIV38).



1

## 2 **Differentiation of iPSCs into cortical neurons**

3 For cortical neuron differentiation, 70% confluent iPS cells maintained in mTeSR Plus media on  
4 10 cm dishes were used for embryoid bodies (EBs) formation. The cells were cultured in low  
5 attachment six well plates (Greiner bio-one # 657970) using WiCell Medium containing:  
6 DMEM/F12 (Gibco #11330057), 25% knock out serum replacement (Gibco # 10828-028), 1.3%  
7 L-glutamine (Gibco # 35050-061), 1.3% NEAA (Gibco # 11140-050), 0.1mM 2-Mercaptoethanol  
8 (Sigma# M3148) and placed on a shaker in the incubator for 8 days to allow EBs formation. EBs  
9 were then resuspended in Forebrain Neural Induction Media (FB-NIM) containing: DMEM/F12,  
10 1% N2 supplement (Gibco # 17502-048), 1% NEAA, 2ug/mL heparin (Sigma # H3149), 10  
11 µg/mL bFGF (Stemcell Technologies # 78003) and plated on to T25 flasks coated with basement  
12 membrane matrigel (Corning # 356234) to allow formation of neuronal rosettes. Neuronal  
13 rosettes were maintained in FB-NIM for the next 10 days and then, collected and maintained in  
14 suspension on a shaker with half FB-NIM media changes every other day to allow for  
15 neurosphere growth. Neurospheres were maintained for 20 days in FB-NIM and then  
16 resuspended using forebrain neuronal differentiation media (FB-DM) containing: Neurobasal  
17 Medium (Corning # 21103-049), 2% B27 (Gibco # 17504-044), 10 ug/mL BDNF (Stem cell  
18 technologies # 78005), 10 ug/mL GDNF (Stem cell technologies # 78058), 1µg/mL laminin (Life  
19 technologies # 23017-015), 3.3 µg/mL cAMP (Stem cell technologies # 73884), 3.52 µg/mL  
20 Ascorbic acid (Stem cell technologies # 72132 ), 0.5mM L-glutamine and 1% NEAA and then  
21 plated on to T25 flasks. iPSC cortical neurons were harvested on DIV 65-72 for RNA sequencing  
22 analysis.

1

## 2 **Immunocytochemistry of iPSC-MG**

3 For iPSC-MG DIV 28-33 of microglia differentiation, non-adherent iPSC-MGs were collected and  
4 plated onto a 4 or 8 well fibronectin (sigma # F0895; 1:40) coated chamber slides at a seeding  
5 density of 250 000 or 125 000 cells per well respectively. One hour after plating, cells were fixed  
6 with 4% paraformaldehyde (PFA; Electron Microscopy Sciences # 15714-S) for 20 minutes,  
7 washed three times in PBS for 5 minutes and then, blocked with 0.2% Triton X-100 and 5%  
8 Normal Goat Serum (Vector # S1000) for 1 h at room temperature. Primary antibodies were  
9 prepared in blocking solution and applied overnight at 4 °C. The following primary antibodies  
10 were used during our studies: anti- PU.1 (Cell Signaling Technology # 2266S) 1:500; anti-  
11 P2RY12 (Sigma # HPA014518) 1:500; anti-CX3CR1 (Biorad/AbD Serotec # AHP1589) 1:500;  
12 anti-TREM2 (abcam # AB209814) 1:500; anti-TMEM119 (abcam # ab185333) 1:100; anti-  
13 LAMP1 (Developmental Hybridoma Bank # H4A3-s) 1:100; anti-EAA1 (BD Biosciences #  
14 610457) 1:700; anti-C9orf72 (Sigma # HPA023873) 1:100; anti-TDP-43 (Cell signaling # 89789,  
15 TDP-43 D9R3L) 1:500; anti-ADAR-2 (Sigma # HPA018277)1:500. Next, cells were washed in  
16 PBS three times for 7 min and then, incubated consecutively with respective fluorophores  
17 secondary antibodies. Alexa Fluorophores (Invitrogen) were used at a 1:750 and prepared in  
18 blocking solution without triton and incubated for 45 minutes at room temperature. Cells were  
19 then washed with PBS three times for 7 min each and DAPI was applied. For nuclear markers  
20 TDP-43 and ADAR, wheat germ agglutinin 680 (Invitrogen # W32465) was used to label iPSC-  
21 MG cell surface. Mounting media ibidi (ibidi # 50001) was used on chambers slides.

22

## 1 **RNA isolation, whole transcriptome library preparation, and sequencing**

2 At DIV 28-30 iPSC-MG from 7 *C9orf72* ALS/FTD patient lines and 4 control lines were pelleted  
3 and lysed using QIAshredder (QIAGEN-79654) and RNA was isolated with RNeasy Mini Kit  
4 (QIAGEN-74104) following the manufacturer's instructions. RNA samples were measured for  
5 quantity with Quant-iT Ribogreen RNA Assay (Thermo Fisher, Cat. No. R11490) and quality with  
6 Agilent High Sensitivity RNA ScreenTape and buffer (Agilent, Cat. No. 5067-5579 & 5067-5580).  
7 For each RNA sample, an indexed, Illumina-compatible, double-stranded cDNA whole  
8 transcriptome library was synthesized from 1 $\mu$ g of total RNA with Takara Bio's SMARTer  
9 Stranded Total RNA Sample Prep Kit – HI Mammalian (Takara Bio, Cat. No. 634876) and  
10 SMARTer RNA Unique Dual Index Kit (Takara Bio, Cat. No. 634418). Library preparation  
11 included ribosomal RNA depletion, RNA fragmentation (94 °C for 3 min), cDNA synthesis, and  
12 a 12-cycle unique dual indexing enrichment PCR. Each library was measured for size with  
13 Agilent's High Sensitivity D1000 ScreenTape and reagents (Agilent, Cat. No. 5067-5584 & 5067-  
14 5603) and concentration with KAPA SYBR FAST Universal qPCR Kit (Kapa Biosystems, Cat.  
15 No. KK4824). Libraries were then combined into an equimolar pool which was also measured  
16 for size and concentration. The pool was clustered onto a paired-end flowcell (Illumina, Cat. No.  
17 20012861) with a 20% v/v PhiX Control v3 spike-in (Illumina, Cat. No. FC-110-3001) and  
18 sequenced on Illumina's NovaSeq 6000. The first and second reads were each 100 bases.

19

## 20 **Human tissue RNA sequencing**

21 We accessed human brain tissue RNA sequencing performed by Target ALS and the New York  
22 Genome Center (<http://www.targetals.org/research/resources-for-scientists/resource-genomic->

1 [data-sets/](#)). Sixteen cases of control frontal cortex, 8 *C9orf72* ALS/FTD frontal cortex, 15 control  
2 motor cortex, 12 *C9orf72* ALS/FTD frontal cortex, 4 control occipital cortex and 5 *C9orf72*  
3 ALS/FTD frontal cortex were evaluated for differential expression of microglia specific genes  
4 (Table S4). All sequencing data is publicly available at  
5 <https://metronome.nygenome.org/tutorials/>.

6

### 7 **RNA sequencing analysis**

8 Fastq files were quality and adapter trimmed using cutadapt (version 1.14). Adapter trimmed  
9 fastq files were then aligned to the human genome (hg38, gencode v29) using STAR (version  
10 2.6.1d) with default options. RNA count matrices were pulled from aligned BAM files using  
11 featureCounts (version 1.6.4). All downstream statistical analysis was done in R (version 3.6.2)  
12 using raw counts matrices from featureCounts as input. Low expression genes were filtered such  
13 that genes with mean read counts < 10 were removed from the analysis. Differential expression  
14 analysis was done using DESeq2 (version 1.26.0) using disease status as the model. Volcano  
15 plots were generated from DESeq2 output using EnhancedVolcano. Heatmaps were generated  
16 using heatmap from z-scores calculated from DESeq2 normalized gene counts. Tissue data  
17 from Target ALS was downloaded from the New York Genome Center as raw fastq files and  
18 pushed through an identical analysis pipeline as data generated in our lab.

19

### 20 **Repeat primed PCR to detect the presence of C9 HRE in iPSC and iPSC-MG**

21 We followed previous established protocols (65) to determine the presence the hexanucleotide  
22 repeat expansion (G<sub>4</sub>C<sub>2</sub>: >30) in *C9orf72* of iPSC and iPSC-MG (Table S2).

1

## 2 **Real-time quantitative RT-PCR**

3 RNA was isolated using Qiagen RNeasy Micro Kit (Cat #74004) according to manufacturer's  
4 instructions. RNA was reverse transcribed to cDNA with oligo(dT) with the Promega Reverse  
5 Transcriptase System (Cat # A3500) and analyzed using SYBR Green Master Mix (Applied  
6 Biosystems). *C9orf72* (Forward- 5'- CAGTGATGTCGACTCTTTG -3' and Reverse- 5'  
7 AGTAGCTGCTAATAAAGGTGATTTG -3'). Expression was normalized to RPL13A (Forward- 5'  
8 CCTGGAGGAGAAGAGGAAAGAGA-3' and Reverse- 5'  
9 TTGAGGACCTCTGTGTATTTGTCAA-3') or B2M (Forward- 5'  
10 TGCTGTCTCCATGTTTGATGTATCT-3' and Reverse- 5' TCTCTGCTCCCCACCTCTAAGT-  
11 3').

12

## 13 **Western blotting**

14 Microglia cell pellets were homogenized in RIPA lysis and extraction buffer (Thermo Scientific,  
15 Cat #89900), supplemented with protease inhibitor cocktail (complete, Roche) and phosphatase  
16 inhibitor cocktail (PhosSTOP, Roche). Protein concentration was determined by BCA assay kit  
17 (Thermo Fisher, Cat# 23225). Cell lysates were separated on 4-20% protean TGX precast gels  
18 (Biorad, Cat # #4561096) and blotted onto nitrocellulose membranes (Biorad, Cat # 1704159).  
19 Membranes were blocked for 60 min with Odyssey blocking buffer (PBS, Li-Cor, Cat #927-  
20 40000) and incubated overnight at 4°C with anti-C9orf72 (GeneTex Cat #. GTX634482, 1:1000),  
21 and anti-β tubulin (Sigma-Aldrich T6074, 1:1000) antibodies. After washing membranes were

1 incubated for 60 min with IRDye fluorescent secondary antibodies (Li-Cor). After washing, blots  
2 were subsequently analyzed with Li-COR imaging system (Odyssey CLx).

3

#### 4 **Immunoassay analysis of poly-(GP)**

5 Levels of poly-(GP) in cell lysates were measured in a blinded fashion using a Meso Scale  
6 Discovery (MSD) immunoassay and a MSD QUICKPLEX SQ120 instrument. A purified mouse  
7 monoclonal poly-(GP) antibody was used as both the capture and detection antibody (TALS  
8 828.179, Target ALS Foundation). The capture antibody was biotinylated and used to coat 96-  
9 well MSD Small Spot Streptavidin plates, whereas the detection antibody was tagged with an  
10 electrochemiluminescent label (MSD GOLD SULFO-TAG). Lysates were diluted to the same  
11 protein concentration, and each sample was tested in duplicate. For each well, the intensity of  
12 emitted light, which is reflective of poly-(GP) levels and presented as arbitrary units, was  
13 acquired upon electrochemical stimulation of the plates.

14

#### 15 **Phagocytosis of A $\beta$ protein by iPSC-MG**

16 On DIV 30 of microglia differentiation, iPSC-MGs were plated on to 4 chambers glass slides  
17 coated with human fibronectin (sigma # F0895; 1:40) at a cell density of 250 000 cells per  
18 chamber. One hour after plating, iPSC-MGs were treated for 5 minutes with vehicle (DMSO) or  
19 1 $\mu$ M of fluorescently labeled A $\beta$  (1-40) TAMRA (human A $\beta$ , AnaSpec # AS-60488; (66))  
20 prepared in microglia basal media with growth factors. All iPSC-MGs were washed at 5min with  
21 microglia basal media supplemented with growth factors. IPSC-MGs were then fixed after 5  
22 minutes, 30 minutes, and 1 h and immunostained for TREM2 as described above. Cells were

1 then imaged using a Zeiss LSM800 confocal microscope. Using Imaris Software from Bitplane  
2 we determine the cell volume and percentage of the microglia surface area covered by A $\beta$  (1-  
3 40) TAMRA at different time points.

4

## 5 **Generation of human brain synaptoneurosomes**

6 Fluorescently labeled pHrodo (a pH sensitive dye that fluoresces only in acidic compartments)  
7 human brain synaptoneurosomes (hSN-rodo) were generated as described previously (67, 68).  
8 Briefly, brain tissue from temporal cortex people with no neurological disease was acquired from  
9 the MRC Edinburgh Sudden Death Brain Bank. Use of human tissue for post-mortem studies  
10 has been reviewed and approved by the Edinburgh Brain Bank ethics committee and the  
11 ACCORD medical research ethics committee, AMREC (approval number 15-HV-016; ACCORD  
12 is the Academic and Clinical Central Office for Research and Development, a joint office of the  
13 University of Edinburgh and NHS Lothian). The Edinburgh Brain Bank is a Medical Research  
14 Council funded facility with research ethics committee (REC) approval (11/ES/0022). Frozen  
15 tissue was homogenized in buffer containing 25mM HEPES, 120 mM NaCl, 1 mM MgCl<sub>2</sub>, 2 mM  
16 CaCl<sub>2</sub>, and protease and phosphatase inhibitors. The homogenate was passed through an 80  
17  $\mu$ m filter then a 5  $\mu$ m filter then centrifuged at 1000xg for 7 minutes to yield the  
18 synaptoneurososome pellet. Pellets were resuspended in 100 mM sodium carbonate buffer (pH 9)  
19 and tagged with pHrodo Red at 4mg/mL with gentle shaking at room temp for 1 hour. Samples  
20 were centrifuged at 13,000 rpm for 10 minutes and the pellet containing labelled  
21 synaptoneurosomes was washed 3x with PBS to remove unbound dye and resuspended in 5%  
22 DMSO-PBS.

1

## 2 **Engulfment of human brain synaptoneurosomes by iPSC-MG**

3 On DIV 30 of the microglia differentiation, iPSC-MGs were plated on to 8 chamber glass slides  
4 that were coated with human fibronectin (sigma # F0895; 1:40) at a cell density of 62 000 cells  
5 per chamber. One hour after plating, we labeled live microglia with the nuclear marker Hoechst  
6 33342 (Thermo fisher # H3570). Then, control and *C9orf72* iPSC-MGs were treated with 1:100  
7 dilution of 4mg/mL hSN-rodo in the presence or absence of 10  $\mu$ M cytochalasin-D (inhibitor of  
8 actin polymerization). Confocal live cell imaging of iPSC-MGs was done using a 20X objective  
9 of a Zeiss 800 confocal microscope. IPSC-MGs were imaged every 10 minutes for up to 6 h. All  
10 lines had three technical replicates for the hSN-rodo treatment. Six images were taken per well  
11 of each line for a total of 18 images every 10 minutes. All images were analyzed using Imaris  
12 Software from Bitplane. To determine the percentage of iPSC-MGs engulfing hSN-rodo, the  
13 spots module was used to count the total number of iPSC-MGs and the total number of  
14 phagocytic iPSC-MGs per image. Additionally, we quantified the fluorescence mean intensity of  
15 the cargo hSN-rodo per phagocytic cell at the 2 h time point, where more than 60% of the iPSC-  
16 MGs were engulfing hSN-rodo. Cytochalasin D was used as a negative control.

17

## 18 **Immunofluorescence of human tissue**

19 Cognitive impaired *C9orf72* positive and non-ALS control patient postmortem frontal cortex and  
20 motor cortex tissue were obtained from Target ALS (n= 2 cases per group, Table S5). Paraffin  
21 embedded sections were de-paraffinized in two separate 10 minute Clearite (Thermo Fisher #  
22 6901) washes. Sections were dehydrated in subsequent two 100%, one 95%, and one 70%



1 ethanol 3 minute washes. Sections were then washed three times in PBS for 5 minutes each.  
2 Antigen retrieval was then performed in 10 mM Na-Citrate buffer (pH 6.0) for 10 minutes in a  
3 microwave at 80% power. Slides were cooled at room temperature for 1 h, then washed in PBS  
4 three times for 5 minutes each. Sectioned tissue was blocked at room temperature for 1 h in  
5 Dako blocking solution (Dako # X0909). Sections were then incubated in antibody dilutant (Dako  
6 # S3022) solution containing primary antibodies anti-Iba1 (Wako # 019-19741) at 1:500 and  
7 either EEA1 (BD Biosciences # 610457) at 1:50 or LAMP1 (DSHB # H4A3) at 1:50 for 16 h at  
8 4°C in a humidified chamber. Human sections were washed three times for 10 minutes each in  
9 PBS then incubated in Dako antibody dilutant with 1:500 Alexa Fluor 488 (Invitrogen # A11029)  
10 secondary antibody for 1 h at room temperature. The tissue sections were then washed three  
11 times in PBS for 10 minutes. This was followed by incubation in Dako antibody dilutant solution  
12 containing 1:500 Alexa Fluor 555 (Invitrogen – A21429) secondary antibody for 1 h at room  
13 temperature. Again, the tissue sections were washed three times in PBS for 10 minutes each.  
14 Finally, the sections were incubated in DAPI (Invitrogen # D1306) 1:10,000 in PBS for 15  
15 minutes, and then washed once more for 5 minutes in PBS. The sections were coverslip using  
16 ProLong™ Glass Antifade Mountant (Invitrogen # P36984).

17

### 18 **IPSC-MG cytokine assay**

19 On DIV 29, iPSC-MGs were plated on to 4 chambers glass slides coated with human fibronectin  
20 (sigma # F0895; 1:40) at a cell density of 250 000 cells per chamber. On DIV 30, control and  
21 disease iPSC-MGs were treated with LPS (100ng/mL) for 6 h, based on previous studies (69,

1 70). The conditioned media was collected and analyzed for cytokine/chemokine profile using the  
2 V-PLEX human cytokine kit (MesoScale) per manufacturer's protocol.

3

#### 4 **Confocal microscopy and bright-field imaging**

5 All immunostained iPSC-MGs and *post-mortem* human tissue were visualized and imaged using  
6 a Zeiss LSM800 laser scanning confocal microscope. Per staining, all images were taken with  
7 same settings for parallel cultures. For all iPSC-MG immunostainings and A $\beta$  (1-40) TAMRA  
8 phagocytic activity assay, a plan Apochromat 63x oil immersion objective was used; Z-stacks  
9 were generated with 1024 x 1024 image size, 0.5x XY scan zoom and 1 $\mu$ m scaling. For some  
10 immunostainings, differential interference contrast (DIC) was used to highlight iPSC-MG surface  
11 area. For live cell imaging of iPSC-MG engulfing synaptoneurosome, confocal microscopy with  
12 differential interference contrast was used. Tiled images were captured using a 20X objective  
13 with a 1.0x XY scan zoom and 0.624  $\mu$ m x 0.624 $\mu$ m scaling. For human tissue staining, all tissue  
14 sections were imaged using Plan Apochromat 63x oil immersion objective with a 2x zoom. Z-  
15 Stack images were acquired using identical laser settings and normalized within a given  
16 experiment. Bright-field images of the iPSC-MG cultures were taken using a Zeiss AxioVert.A1  
17 microscope and a resolve HD Ludesco camera.

18

#### 19 **Imaging analysis using Imaris Software from Bitplane**

20 All images were processed and analyzed using Imaris Software 9.5.1 and 9.6 from Bitplane. In  
21 order to obtain volume, area, mean intensity and sum intensity per cell for a large number of  
22 samples, we assigned a randomized color identification per cell followed by the use of

1 ImarisVantage module to extract multiple numerical values from the created 3 dimensional  
2 structures. For *iPSC-MG marker characterization*, the spots module was used to count the total  
3 number of cells positive for a specific microglia marker per image while using the DAPI channel  
4 as a reference. To calculate the *TDP-43 and ADAR-2 nucleocytoplasmic ratio (N/C ratio)*, we  
5 used the surface module to generate iPSC-MG microglia 3 dimensional cellular (based on  
6 membrane staining with wheat germ agglutinin) and nuclear surfaces (based on DAPI). The sum  
7 intensity of TDP-43 or ADAR-2 was acquired for the nucleus and cytoplasm as well as the  
8 volume for each cellular compartment. The following formula was used: (Cell Sum Intensity –  
9 Nucleus Sum Intensity) = Cytoplasm Sum Intensity; (Cell Volume – Nucleus Volume) =  
10 Cytoplasm Volume.  $N/C\ ratio = (Nucleus\ Sum\ Intensity / Nucleus\ volume) / (Cytoplasm\ Sum$   
11  $Intensity / Cytoplasm\ volume)$ . Data from each cell was acquired by assigning randomized color  
12 identification followed by the use of ImarisVantage. For the *A $\beta$  (1-40) TAMRA phagocytic*  
13 *activity*, we used *A $\beta$  (1-40) TAMRA* fluorescence signal and chose an ideal threshold to create  
14 the *A $\beta$*  surfaces inside the iPSC-MGs. TREM2 staining was used to generate the cell surface  
15 structures. An algorithm was also generated and used in all iPSC-MG parallel cultures.  
16 Randomized color identification and ImarisVantage was also used to extract all data like  
17 previous data sets. For *hSN-rodo live cell imaging over time*, the spots module was used to  
18 count the total number of cells over time. Phagocytic cells were manually identified based on  
19 hSN-rodo signal inside iPSC-MG per hour. We set a threshold between 10,000-12,000 units  
20 above grey scale as the positive signal indicative of engulfment and lysosomal internalization.  
21 At the 2 h time point, the cell surface area of phagocytic cells was manually outlined using Imaris  
22 Software manual creation tool and the hSN-rodo mean intensity value was obtained per cell. For

1 *iPSC-MGs EEA1 and Lamp1 analysis*, based on the staining pattern we manually choose an  
2 optimal threshold for each protein marker to generate the 3D surfaces. We then, stored the  
3 surfaces algorithms and used it in all iPSC-MG parallel cultures. Randomized color identification  
4 and ImarisVantage were then used to extract the cell volume and mean intensity of both markers  
5 per cell. For *EEA1 and Lamp1 post-mortem human tissue analysis (Frontal cortex and Motor*  
6 *cortex)*, microglia 3 dimensional cell surface was generated per image and the mean intensity  
7 of each cytoplasmic marker was quantified per cell.

8

## 9 **Statistical analysis**

10 Statistical Analysis for RNA sequencing was done in R (version 3.6.2) and detailed above. All  
11 other statistical analyses were performed using Graphpad Prism 7 and 8. For comparison of two  
12 groups we used two-tailed Student's t-test. Two tailed Mann Whitney test was performed for the  
13 poly-(GP) ELISA assay. We performed multiple t-test for the iPSC-MGs cytokine release profile,  
14 to adjust for multiple corrections we used Holm-Sidak method. All statistical significance was  
15 ranked as the following: \*  $p \leq 0.05$ ; \*\*  $p \leq 0.01$ ; \*\*\*  $p \leq 0.001$ ; \*\*\*\*  $p \leq 0.0001$  and  $p > 0.05$  not  
16 significant. All other statistical details and exact p-values are reported in each Figure legend.

17

## 18 **Results**

### 19 ***C9orf72* ALS/FTD patient and control iPSCs differentiate into brain-like microglia**

20 Following recently established protocols (53, 57) we differentiated control and *C9orf72* ALS/FTD  
21 patient iPSC lines into microglia (Fig. 1a; Additional File 7: Table S1-S3). At a mature stage of  
22 40 days *in vitro* (DIV), both control and *C9orf72* ALS/FTD iPSC-MG display a typical ramified

1 microglia morphology (Fig. 1b) and express classic microglia marker proteins including the  
2 myeloid transcription factor PU.1, purinergic surface receptor P2RY12 and C-X3-C Motif  
3 Chemokine Receptor 1 (CX3CR1), as confirmed via fluorescent immunocytochemistry (Fig. 1c;  
4 Additional File 1: Figure S1a-b). Differentiated microglia uniformly expressed the triggering  
5 receptor expressed on myeloid cells 2 (TREM2) and transmembrane protein 119 (TMEM119),  
6 further demonstrating a commitment to microglia fate, with no differences detected between  
7 *C9orf72* iPSC-MG and control iPSC-MG (Fig. 1c; Additional File 1: Figure S1a-b). To validate  
8 microglia lineage, we performed Illumina paired-end deep RNA sequencing analysis (RNA-seq)  
9 on control and *C9orf72* ALS/FTD iPSC-MG (Fig. 1d-e). At a transcriptional level, control and  
10 *C9orf72* iPSC-MG clustered together and presented with a unique transcriptome compared to  
11 iPSC differentiated into cortical neurons (iPSC-CN; Fig. 1d). Principal component analysis of this  
12 RNA-seq dataset revealed a highly similar gene expression profile within iPSC-MG and different  
13 from iPSC-CNs (PC2, 1.66% variance), confirming that these populations are distinct from each  
14 other (PC1, 94.87% variance; Fig. 1e). Moreover, to verify the absence of other cell types in the  
15 differentiated iPSC-MG cultures, we quantified known cell type specific markers revealing high  
16 expression of microglia-enriched genes and low expression for transcripts unique to astrocytes,  
17 oligodendrocyte precursor cells (OPC), oligodendrocytes, neurons, endothelial cells and  
18 pericytes (71) (Fig. 1f). These data confirm that the differentiation of microglia from iPSC results  
19 in brain-like microglia that express microglia-enriched genes and proteins, distinct from other  
20 cell types. Furthermore, no inherent differences were observed between control and *C9orf72*  
21 ALS/FTD iPSC-MGs.

22

## 1 **The transcriptional profile of C9orf72 ALS/FTD iPSC-MG resembles control iPSC-MG**

2 To test if *C9orf72* microglia exhibit intrinsic disease-mediated gene expression alterations, we  
3 analyzed our RNA sequencing data for differential expression between mature control and  
4 *C9orf72* ALS/FTD iPSC-MG. This analysis revealed several genes with significantly altered  
5 expression in *C9orf72* ALS/FTD iPSC-MG (27 genes; log<sub>2</sub> fold change (FC)  $\pm$  1, p value <0.05;  
6 Fig. 2a; Additional File 2: Figure S2a). We next determined if 881 RNA transcripts previously  
7 reported to be enriched in cortical microglia were differentially expressed in our dataset, but  
8 found no significant dysregulation of these select genes (Fig. 2b) (52). These data suggest that  
9 the *C9orf72* HRE does not alter the inherent microglia-enriched transcriptional profile indicating  
10 that *C9orf72* ALS/FTD and control iPSC-MG share a similar transcriptome in the absence of  
11 surrounding CNS cell types, including neurons and macroglia, such as astrocytes and  
12 oligodendrocytes. To support this hypothesis we analyzed existing RNA sequencing datasets  
13 obtained through the Target ALS consortium and the New York Genome Center. We evaluated  
14 gene expression changes of the 881 microglia-enriched RNA transcripts in frontal cortex and  
15 motor cortex brain tissues of *C9orf72* ALS/FTD patients (Fig. 2c-d; Additional File 2: Figure S2b;  
16 Additional File 7: Table S4). We also quantified gene expression changes in the occipital cortex  
17 as a brain region considered to be disease-unaffected in ALS/FTD (Additional File 2: Figure S2c-  
18 d; Additional File 2: Table S4). Notably, of the 881 microglia-enriched genes, 18 were  
19 dysregulated in frontal cortex, 20 in motor cortex and eight in the occipital cortex (Fig. 2c-d;  
20 Additional File 2: Figure S2b-d). It is important to note that gene expression alterations in  
21 diseased microglia would not only consist of microglia-enriched transcripts, but also transcripts  
22 critical for cellular health and function expressed in all cell types. However, these were not

1 captured through the analysis of the 881 microglia-enriched genes. Therefore, we expanded our  
2 analysis of the RNA-seq dataset to examine overall transcriptional changes in the select brain  
3 regions, not cell-type specific, which revealed significant gene dysregulations in all brain regions  
4 of *C9orf72* ALS/FTD brain tissues (Additional File 3: Figure S3a-b; ( $\log_2$  fold change (FC)  $\pm 1$ , p  
5 value  $<0.05$ ). Together these data suggest that the *C9orf72* HRE in iPSC-MG mono-cultures is  
6 not sufficient to induce inherent transcriptional alterations of microglia-enriched genes.

7  
8 ***C9orf72* ALS/FTD iPSC-MG exhibit reduced *C9orf72* protein levels and express *C9orf72***  
9 **hexanucleotide repeat expansion-associated poly-(GP) DPR protein**

10 The study of ALS and FTD has long taken a neurocentric approach, whereby neurons have  
11 traditionally been recognized as the cell type most affected by the aforementioned *C9orf72*  
12 disease mechanisms. However, glia cells have been shown to exhibit *C9orf72* associated  
13 phenotypes in postmortem tissue, including repeat RNA foci and DPR proteins, albeit to a lesser  
14 extent than neurons (33, 72-76).

15 To evaluate *C9orf72* iPSC-MG for *C9orf72*-specific disease mechanisms, we first tested *C9orf72*  
16 iPSC-MGs for haploinsufficiency by examining the levels of the *C9orf72* transcript in *C9orf72*  
17 ALS/FTD and control iPSC-MG. Many studies have reported *C9orf72* haploinsufficiency in  
18 patient tissue, however variable results have been observed in human patient-derived *C9orf72*  
19 iPSC-differentiated cells, including neurons and astrocytes (72, 76, 77). In a similar fashion, no  
20 differences in *C9orf72* transcript levels were detected between control and *C9orf72* iPSC-MG in  
21 our RNA-seq dataset (Fig. 3a) or by quantitative RT-PCR of *C9orf72* (Fig. 3b), which is  
22 consistent with previous published data. To measure *C9orf72* protein levels we performed

1 quantitative western blot analysis from control and *C9orf72* ALS/FTD iPSC-MG lysates, which  
2 revealed a significant reduction in C9orf72 protein in *C9orf72* ALS/FTD iPSC-MGs (Fig. 3c-d;  
3 Additional File 4: Figure S4a). The western blot analysis was further confirmed by C9orf72  
4 immunostaining of iPSC-MG (Fig. 3e).

5 Sense and antisense GGGGCC/CCCCGG repeat associated non-AUG (RAN) translation  
6 produces five different DPR proteins that accumulate in cells and are proposed to contribute to  
7 toxicity and cellular dysfunction (78-83). Here, we assessed the presence of poly-(GP) in mature  
8 iPSC-MG cultures by measuring poly-(GP) abundance in cell lysates using a customized  
9 immunoassay (84). We detected a significant increase in poly-(GP) levels in *C9orf72* ALS/FTD  
10 iPSC-MGs compared to controls, showing for the first time that the *C9orf72* HRE translates into  
11 DPR proteins in microglia mono-cultures (Fig. 3f).

12 Cytoplasmic TDP-43 inclusions are the hallmark pathology of ALS and FTD and have been  
13 reported in glia cells of *C9orf72* ALS/FTD postmortem tissues (85-87). To evaluate whether  
14 iPSC-MG mono-cultures exhibit cytoplasmic TDP-43 inclusions, we performed  
15 immunocytochemistry on iPSC-MG for TDP-43 and measured the nucleocytoplasmic (N/C) ratio  
16 of TDP-43 using confocal microscopy. No significant difference in the TDP-43 N/C ratio was  
17 observed between control and *C9orf72* ALS/FTD microglia at 40 DIV (Additional File 4: Figure  
18 S4b-c). One explanation for TDP-43 mislocalization is a defect in nucleocytoplasmic trafficking  
19 leading to the retention of TDP-43 protein in the cytoplasm (88-90). Our laboratory has recently  
20 shown that another RNA binding protein, the RNA editing enzyme adenosine deaminase acting  
21 on double stranded RNA 2 (ADAR2), is mislocalized to and accumulates in the cytoplasm of  
22 neurons in *C9orf72* ALS/FTD (91). We therefore wondered whether *C9orf72* microglia would



1 display ADAR2 mislocalization despite the lack of cytoplasmic TDP-43 inclusions. Similar to  
2 TDP-43, immunocytochemistry of *C9orf72* ALS/FTD iPSC-MG for ADAR2 revealed no  
3 nucleocytoplasmic mislocalization resulting and an unchanged N/C ratio in microglia mono-  
4 cultures (Additional File 4: Figure S4d-e). These data suggest that, while *C9orf72* ALS/FTD  
5 iPSC-MG mono-cultures do exhibit *C9orf72* pathobiological phenotypes, there are no microglia  
6 cytoplasmic inclusions of TDP-43 or ADAR2, unlike what is seen in *C9orf72* neurons.

7

### 8 ***C9orf72* ALS/FTD iPSC-MG present with a pro-inflammatory phenotype**

9 Microglia are able to exacerbate or promote neurodegeneration by releasing pro-inflammatory  
10 cytokines, including interleukin-1 (IL-1), interleukin-6 (IL-6) and tumor necrosis factor- $\alpha$  (TNF- $\alpha$ ),  
11 or anti-inflammatory cytokines such as interleukin-4 (IL-4) and interleukin-10 (IL-10) (92-94). As  
12 a result, neuroinflammation is considered a major contributor to neuronal dysfunction in  
13 neurodegenerative diseases, including ALS/FTD (24, 94-96). To investigate if *C9orf72* ALS/FTD  
14 iPSC-MG respond differently to extracellular stimuli, we treated iPSC-MGs with LPS, an  
15 endotoxin used to evoke immune responses *in vitro* and *in vivo*. Following LPS treatment, we  
16 tested for the presence of released chemokines and cytokines in the iPSC-MG cell culture  
17 supernatants, as described recently (57). Under basal conditions, *C9orf72* ALS/FTD iPSC-MG  
18 mono-cultures showed a significant increase in IL-1 $\alpha$ , IL-6 and TNF- $\alpha$  compared to control iPSC-  
19 MGs (Fig. 4). Upon LPS stimulation, both control and *C9orf72* ALS/FTD iPSC-MG exhibited  
20 increased release of IL-1 $\alpha$ , IL-1 $\beta$  and IL-6 compared to basal conditions, with a significantly  
21 higher increase detected in *C9orf72* iPSC-MGs (Fig. 4). These results confirm the ability of iPSC-

1 MG to respond to extracellular stimuli via specific cell surface receptor activation and support  
2 previous studies showing altered pro-inflammatory responses of *C9orf72* microglia (30).

3

#### 4 ***C9orf72* ALS/FTD iPSC-MGs exhibit altered phagocytic activity**

5 A major function of microglia is to clear unwanted toxic substances and cell debris that can  
6 negatively impact brain function via phagocytosis. To determine whether control and *C9orf72*  
7 ALS/FTD iPSC-MG differ in their phagocytic activity and ability to clear toxic products we  
8 measured iPSC-MG engulfment of a fluorescently tagged A $\beta$  cargo, known to be phagocytosed  
9 by microglia (66, 97). We treated iPSC-MGs for 5 minutes with 1 $\mu$ M A $\beta$  (1-40)-TAMRA or vehicle  
10 and then assessed engulfment and clearance of A $\beta$  (1-40)-TAMRA at different time points after  
11 A $\beta$  washout. To quantify this engulfment, we performed immunohistochemistry on iPSC-MG for  
12 TREM2, an immune receptor selectively expressed in microglia (Fig. 5 a-c; g-i). We then  
13 calculated the percentage of iPSC-MG surface area covered by A $\beta$  (1-40)-TAMRA protein in  
14 individual cells (Fig. 5 d-f; Fig. 5j-l). A $\beta$  (1-40)-TAMRA was similarly internalized in both  
15 experimental groups after 5 minutes suggesting a comparable degree of uptake between control  
16 and *C9orf72* iPSC-MG (Fig. 5m). However, after 30 minutes and 1 h, *C9orf72* ALS/FTD iPSC-  
17 MG exhibited increased cellular A $\beta$  (1-40)-TAMRA loading suggesting delayed clearance of  
18 engulfed A $\beta$  (1-40)-TAMRA from intracellular compartments compared to control iPSC-MG (Fig.  
19 5m). No significant differences in the total microglia cell surface area were observed (Fig. 5n).  
20 These data suggest that the mutation in *C9orf72* alters protein degradation pathways in iPSC-  
21 MG.

22

1 ***C9orf72* ALS/FTD iPSC-MGs demonstrate altered engulfment of human brain**  
2 **synaptoneurosomes**

3 An important aspect of microglia-neuron communication in neurodegeneration is the role of  
4 microglia in the maintenance and refinement of synaptic networks through the selective pruning  
5 of synapses. This process occurs predominantly, but not exclusively, during development (98-  
6 100). However, synaptic pruning pathways are known to be re-activated in neurodegeneration  
7 leading to synapse loss and contributing to cognitive impairments (101-104). To determine if  
8 iPSC-MG can phagocytose synapses and to test whether *C9orf72* microglia exhibit altered  
9 phagocytosis due to the *C9orf72* HRE, we exposed iPSC-MG mono-cultures to human brain  
10 synaptoneurosomes (hSN) and followed synaptoneurosomes engulfment via live confocal  
11 microscopy. Fresh frozen control human postmortem tissues were used to prepare hSN.  
12 Synaptic fractions contained the pre-synaptic protein synaptophysin and the post-synaptic  
13 density 95 (PSD-95) compared to total brain homogenate and nuclear marker histone 3  
14 (Additional File 5: Figure S5a-b). Control and *C9orf72* ALS/FTD iPSC-MGs were labeled with  
15 the live nuclear marker Hoechst (Fig. 6a-i) to identify individual cells followed by treatment with  
16 hSN fluorescently tagged with pHrodo succinimidyl ester (hSN-rodo; Fig. 6a; Fig. 6j-q). After  
17 treatment of iPSC-MGs with hSN-rodo we performed fluorescent live cell imaging for 6 h,  
18 capturing images every 10 min (Additional File 6: Figure S6 and Additional File 8: Movie S1).  
19 Here, an increase in pHrodo fluorescence is indicative of an uptake of hSN-rodo into acidic  
20 intracellular compartments of iPSC-MGs. Quantification of individual iPSC-MG showed a distinct  
21 rapid internalization of hSN-rodo in control and *C9orf72* ALS/FTD iPSC-MGs (Fig. 6r). iPSC-MG  
22 phagocytosis was reduced significantly in the presence of cytochalasin-D, an actin

1 polymerization inhibitor known to inhibit phagocytosis (Fig. 6r-s). 69% of control and 71% of  
2 *C9orf72* iPSC-MG were actively phagocytosing after 2 h (Fig. 6r). Interestingly, the mean  
3 intensity of hSN-rodo was significantly increased in *C9orf72* ALS/FTD iPSC-MGs compared to  
4 controls (Fig. 6s). Together, these data suggest that iPSC-MG exhibit known microglia  
5 phagocytic activity as shown by the engulfment of toxic A $\beta$  protein and brain  
6 synaptoneuroosomes. Moreover, *C9orf72* ALS/FTD iPSC-MGs displayed increased levels of  
7 phagocytosed synaptoneuroosomes, which can be explained through increased phagocytic  
8 activity or insufficient degradation of engulfed content, reflecting the data from the A $\beta$  uptake  
9 studies above.

10

### 11 ***C9orf72* ALS/FTD iPSC-MG exhibit aberrant levels of EEA1 and Lamp1**

12 The major function of the *C9orf72* protein is the regulation of vesicle trafficking. The *C9orf72*  
13 protein structure resembles that of a Rab guanine nucleotide exchange factor (RabGEF), which  
14 in turn activates Rab proteins to regulate membrane trafficking (105, 106). Supporting this notion  
15 is evidence of *C9orf72* protein expression in endosomes, autophagosomes and lysosomes and  
16 the fact that *C9orf72* KO mice display defects in the endosomal/lysosomal pathway, as well as  
17 dysregulation of autophagy (30, 107, 108). Studies of the motor cortex and spinal cord of *C9orf72*  
18 ALS/FTD postmortem tissues showed enlarged lysosomes in activated microglia suggesting that  
19 endosomal/lysosomal dysfunction could also be affected in this cell type due to the *C9orf72* HRE  
20 (30, 108, 109).

21 Based on these studies, and our observations of increased retention of phagocytosed  
22 extracellular products in *C9orf72* ALS/FTD iPSC-MG described above, we performed

1 immunohistochemistry for early endosomal and lysosomal markers in control and *C9orf72*  
2 ALS/FTD iPSC-MG. Using confocal microscopy images we generated 3D surfaces of control  
3 (Fig. 7a,d,g) and *C9orf72* ALS/FTD iPSC-MG (Fig. 7b,e,h) to quantify changes in protein  
4 expression of EEA1 (Fig. 7c) and Lamp1 (Fig. 7f), and to measure microglia cell surface volume  
5 (Fig. 7i). While no significant changes were observed in iPSC-MGs cell volume (Fig. 7i),  
6 quantification of the mean fluorescence intensity of EEA1 and Lamp1 per cell revealed a  
7 significant increase in EEA1 (Fig. 7a-c) and a significant reduction in Lamp1 (Fig. 7d-f). We found  
8 no significant differences in the relative expression of mRNA in the endosomal-lysosomal  
9 pathway (Fig. 7j). Overall, these data suggest that the mutation in *C9orf72* alters the endosomal-  
10 lysosomal pathway of microglia which is likely to contribute to the aberrant phagocytic activities  
11 observed in *C9orf72* iPSC-MG mono-cultures.

12

### 13 ***C9orf72* ALS/FTD postmortem brain tissue analysis validates endosomal-lysosomal** 14 **pathway dysfunction observed in iPSC-MG**

15 To validate the observed endosomal-lysosomal alterations in *C9orf72* ALS/FTD iPSC-MG, we  
16 performed immunohistochemistry on *C9orf72* ALS/FTD patient postmortem brain tissues to  
17 examine EEA1 and Lamp1 expression in ionized calcium binding adaptor molecule 1 (Iba-1)  
18 positive microglia (Fig. 8; Additional File 7: Table S5). Quantitative analysis of images taken by  
19 confocal microscopy revealed increased EEA1 and Lamp1 mean fluorescence intensity per  
20 microglia in *C9orf72* ALS/FTD frontal cortex (Fig. 8a-h) and motor cortex (Fig. 8i-p). Interestingly,  
21 the observed changes are more significant in the frontal cortex compared to the motor cortex,  
22 potentially reflecting the FTD-related cognitive impairments documented for these patient donors

1 (Additional File 7: Table S5). Importantly, these data are consistent with the iPSC-MG dataset  
2 above suggesting a dysfunctional endosomal-lysosomal pathway in *C9orf72* ALS/FTD microglia.  
3 In addition, this validation supports the use of this human iPSC-MG *in vitro* model for future  
4 studies aimed at elucidating the role of microglia in *C9orf72* ALS/FTD disease pathogenesis.

5

## 6 **Discussion**

7 An extensive body of evidence has suggested that glia contribute to the neurodegeneration  
8 observed in ALS and FTD (9, 10, 110-113). Transcriptional assessments and proteomic  
9 approaches across the ALS/FTD spectrum have reported robust glia signatures and glia protein  
10 modules, respectively, emphasizing a glia involvement in inflammation and contribution to  
11 disease (109, 113-115).

12

13 In the present study, we generated microglia from *C9orf72* ALS/FTD patient-derived iPSC to  
14 evaluate their cellular and molecular phenotypes. The differentiation protocol was selected  
15 based on the transcriptional and functional similarities between the generated human iPSC-MG  
16 to adult human microglia as well as for their high purity, yield and distinction from other myeloid  
17 cells such as monocytes and dendritic cells (53, 57). The *C9orf72* ALS/FTD iPSC-MG displayed  
18 classic microglia characteristics and presented a unique transcriptomic signature profile  
19 compared to iPSC-CNs or other glia cell types (71). Applying a list of human microglia-enriched  
20 genes from Gosselin and colleagues (52), transcriptional analyses revealed no significant  
21 differences between *C9orf72* ALS/FTD and control iPSC-MG under basal, un-stimulated culture  
22 conditions. Thus, supporting the notion that the presence of the *C9orf72* HRE does not affect

1 iPSC microglia differentiation and their baseline transcriptome. As microglia function is strongly  
2 influenced by the cellular environment, we examined changes of microglia-enriched genes using  
3 existing bulk RNA sequencing data from postmortem *C9orf72* ALS/FTD brain tissues.  
4 Surprisingly, no significant changes in the microglia-enriched genes were found either in the  
5 frontal, motor or occipital cortex supporting the need for single-cell resolution technologies to  
6 better identify changes in gene expression in specific cell populations, similar to what has been  
7 reported in Alzheimer's disease brain tissues' analyses (18, 116-120). Cell type-specific  
8 analyses from postmortem *C9orf72* ALS/FTD brain tissue will further allow for the identification  
9 of subsets of microglia populations and associate their transcriptional signatures with potential  
10 neuroprotective or detrimental roles, as well as microglia-specific disease pathways and  
11 mechanisms. For example, disease-associated microglia (DAM) represent a microglia subtype  
12 which senses and responds to damage through neurodegeneration-associated molecular  
13 patterns and is primarily found at sites of neurodegeneration to clear cellular debris and protect  
14 neurons from dying (116, 121-127). While the presence of DAM has been suggested in ALS, no  
15 detailed investigations on the role of DAM in *C9orf72* ALS/FTD has been reported to date.

16  
17 To our knowledge, this data is the first to indicate that *C9orf72* ALS/FTD iPSC-MG exhibit  
18 intrinsic *C9orf72* pathology. Although, transcriptional analysis indicated variability of *C9orf72*  
19 mRNA levels across *C9orf72* ALS/FTD iPSC-MG patient lines, no significant differences in  
20 *C9orf72* expression were observed by RNA sequencing or qRT-PCR analysis. Our data is  
21 consistent with previous studies in iPSC patient-derived neurons and astrocytes (72, 76).  
22 However, we observed a significant decrease in *C9orf72* protein expression in *C9orf72* iPSC-

1 MG, which is an interesting finding, as previous reports on *C9orf72* iPSC-astrocytes showed no  
2 reduction in *C9orf72* protein levels (76). The loss of function of *C9orf72* protein has been  
3 implicated in alterations of endosomal-lysosomal pathways, hence could certainly contribute to  
4 the phagocytic deficits we observed in *C9orf72* iPSC-MG (30, 107, 108, 128-130). Specifically,  
5 recent studies performed a detailed analysis on *C9orf72* protein localization in control and  
6 *C9orf72* ALS/FTD human induced motor neurons (iMNs) and revealed that a large percentage  
7 of *C9orf72* puncta colocalized with early endosomal marker (EEA1) and Rab5 GTPase,  
8 however, not with lysosomal markers such as Lamp1 (108). Additionally, membrane  
9 fractionation by centrifugation localized *C9orf72* with EEA1 and not with Lamp1. Likewise, when  
10 the number of early endosomes, late endosomes and lysosomes were counted in *C9orf72*  
11 ALS/FTD iMNs and compared to control iMNs, the loss of lysosomes was the major difference  
12 observed between the groups supporting the idea of a potential disruption in the endosomal-  
13 lysosomal pathways and consequently, a contribution to neurodegeneration (107, 108). These  
14 findings are reinforced by studies reporting enlarged lysosomes in *C9orf72* postmortem patient  
15 tissues and previous studies proposing that the function of the *C9orf72* protein is linked to the  
16 regulation of lysosomes and autophagy (30, 130-133). Our data suggests that similar  
17 dysfunctions are present in *C9orf72* microglia as shown in our *in vitro* culture model, but also in  
18 *C9orf72* ALS/FTD patient postmortem brain tissues. Further investigations are required to  
19 determine if *C9orf72* ALS/FTD iPSC-MG have a decrease in the rate of lysosomal degradation  
20 capacity or if a reduction in lysosome numbers due to an impairment of lysosomal biogenesis  
21 causes the accumulation of phagocytosed material in these cellular compartments.

22



1 We also evaluated the *C9orf72* iPSC-MG for the non-canonical translation of DPR proteins,  
2 specifically poly-(GP), and detected a significant increase in poly-(GP) levels compared to  
3 controls. This is the first documentation of endogenous DPR production in *C9orf72* microglia,  
4 suggesting that similar to *C9orf72* iPSC-astrocytes, microglia do undergo repeat-associated  
5 non-ATG translation (76). Recent studies have shown neuron-astroglia transmission of *C9orf72*  
6 associated DPRs via exosomes in an *in vitro* culture system (134). It is yet to be determined if  
7 glia can similarly contribute to transmission of DPRs to neighboring cells.

8  
9 *C9orf72* DPRs have been suggested to contribute to nucleocytoplasmic trafficking defects  
10 present in *C9orf72* ALS/FTD neurons (88, 135, 136). One of the consequences of these  
11 trafficking defects is the mislocalization of nuclear RNA binding proteins, such as TDP-43. TDP-  
12 43 pathology has been shown to be present in glia of *C9orf72* postmortem tissues (85, 87, 137-  
13 139). TDP-43 has further been associated with neuroinflammation, microglia neuroprotection  
14 and the regulation of microglia phagocytosis (66, 126, 140). In the present study, TDP-43  
15 cytoplasmic accumulations or loss of nuclear TDP-43 was not detected in *C9orf72* ALS/FTD  
16 iPSC-MG mono-cultures; similar to what has been observed in *C9orf72* iPSC patient-derived  
17 astrocytes (76). Similar to TDP-43, we found no significant difference in the nucleocytoplasmic  
18 ratio of the RNA editing protein ADAR2, which has recently been shown by our laboratory to be  
19 mislocalized to the cytoplasm of *C9orf72* ALS/FTD iPSC motor neurons, as well as in neurons  
20 in *C9orf72* ALS/FTD postmortem tissues and *C9orf72* ALS/FTD mouse model brain tissues (91).  
21 The absence of TDP-43 and ADAR2 mislocalization could be due to cellular age of the

1 differentiated cells, as recent human postmortem tissue studies suggested that TDP-43  
2 mislocalization is a late stage event of ALS pathogenesis (141).

3  
4 Cerebral spinal fluid and blood cytokine profiles are significantly altered for a large array of  
5 cytokines and chemokines in ALS/FTD (142). In addition, recent data support a correlation of  
6 specific immune responses of gene-associated ALS subgroups to patient survival (94). As for  
7 *C9orf72* ALS/FTD, previous studies in *C9orf72* knockout mice revealed increased IL-6 and IL1 $\beta$   
8 mRNA levels in microglia and an upregulation of inflammatory pathways, suggesting an  
9 association between the loss of *C9orf72* and altered microglia function and pro-inflammatory  
10 phenotypes (30, 39, 73). Here, *C9orf72* ALS/FTD iPSC-MG mono-cultures exhibit an pro-  
11 inflammatory phenotype as supported by significant increases in the inflammatory cytokines IL-  
12 1 $\alpha$ , IL-6 and TNF- $\alpha$  under basal conditions, and even more so upon LPS stimulation. Further  
13 studies are necessary to determine if *C9orf72* ALS/FTD iPSC-MG maintain or exacerbate the  
14 inflammatory phenotype or if an anti-inflammatory response is acquired in the presence of  
15 *C9orf72* ALS/FTD iPSC-neurons or other glia cell types. IL-1 $\alpha$ , TNF and complement component  
16 1q (C1q) are highly expressed and secreted by microglia and are known to be strong inducers  
17 of an A1 reactive astrocyte phenotype (71, 143, 144). A1 reactive astrocytes are dysfunctional  
18 cells unable to support neuronal synapses that acquire a neurotoxic phenotype driving neuronal  
19 death (144, 145).

20

## 21 **Conclusions**

1 Overall, we report intrinsic properties of *C9orf72* ALS/FTD iPSC-MG mono-cultures and set the  
2 stage for the future use of this model in more mechanistic approaches aimed at understanding  
3 the role of microglia in *C9orf72* mediated neurodegeneration. *C9orf72* ALS/FTD iPSC-MG could  
4 be used in a 2 or 3-dimensional co-culture system or could be transplanted into *C9orf72* immune  
5 deficient mice to further assess microglia contribution to neuronal dysfunction and degeneration  
6 in *C9orf72* ALS/FTD. This human cell culture model also provides opportunities for future  
7 therapeutic development and drug screening.

8

## 9 **Abbreviations**

10 iPSCs: induced pluripotent stem cell; iPSC-MG: induced pluripotent stem cells derived microglia;  
11 ALS/FTD: amyotrophic lateral sclerosis/frontotemporal dementia; *C9orf72*: *chromosome 9 open*  
12 *reading frame 72*; HRE: hexanucleotide repeat expansion; G<sub>4</sub>C<sub>2</sub>: GGGGCC; DPR: dipeptide  
13 repeat; TDP-43: TAR-DNA binding protein 43; AD: Alzheimer's disease; CNS: central nervous  
14 system; sALS: sporadic ALS; PC: principal component; LPS: lipopolysaccharide; EEA1: early  
15 endosome antigen 1; Lamp1: lysosomal associated membrane protein 1; CD43<sup>+</sup>: cluster of  
16 differentiating 43 positive; HPCs: hematopoietic progenitor cells; GFs: growth factors; MBM:  
17 microglia basal media; IL-34: interleukin-34; M-CSF: macrophage colony-stimulating factor;  
18 TGFβ<sub>1</sub>: transforming growth factor β<sub>1</sub>; CD200: cluster of differentiation 200; CX3CL1: fractaline  
19 chemokine C-X3-C motif ligand 1; EBs: embryoid bodies; FB-NIM: Forebrain Neural Induction  
20 Media; FB-DM: forebrain neuronal differentiation media; hSN-rodo: human brain  
21 synaptoneurosome fluorescently tagged with pHrodo succinimidyl ester; P2ry12: purinergic  
22 surface receptor P2Y12; CX3CR1: C-X3-C Motif Chemokine Receptor 1; TREM2 triggering

1 receptor expressed on myeloid cells 2; TMEM119: transmembrane protein 119; OPC:  
2 oligodendrocyte precursor cells; RAN: repeat associated non-AUG; N/C: nucleocytoplasmic;  
3 ADAR2: adenosine deaminase acting on double stranded RNA 2; IL-1: interleukin-1; IL-6:  
4 interleukin-6; TNF- $\alpha$ : tumor necrosis factor- $\alpha$ ; IL-4: interleukin-4; IL-10: interleukin-10; RabGEF:  
5 Rab guanine nucleotide exchange factor; Iba-1: ionized calcium binding adaptor molecule 1;  
6 DAM: disease-associated microglia; iMNs: induced motor neurons; C1q: complement  
7 component 1q.

8

## 9 **Declarations**

## 10 **Acknowledgments**

11 We are grateful for all human tissue samples donated to Target ALS to be made available for  
12 our research. We are also thankful for all patients that donated cells for the generation of iPSCs  
13 to be used in our studies. We further acknowledge the receipt of iPSC lines through the ‘Cedars-  
14 Sinai Medical Center’s David and Janet Polak Foundation Stem Cell Core Laboratory’. We thank  
15 both the Target ALS Consortium and the New York Genome Center for access to their RNA  
16 sequencing database. In particular, we would like to thank Drs. Lyle Ostrow and Hemali  
17 Phatnani. We would also like to acknowledge Dr. Ramita D. Karra and Dr. Bryan J. Traynor for  
18 their technical expertise. We would like to give special thanks to members of the Sattler  
19 laboratory for their suggestions and feedback on the manuscript. We would also like to give  
20 thanks to Dr. Ileana Soto-Reyes and Dr. Nadine Bakkar for scientific advice and feedback on  
21 the manuscript.

## 22 **Author contributions**

1 IL: Designed experiments, differentiated iPSC-MG, performed and supervised experiments;  
2 performed quantitative confocal microscope image analysis; acquired and analyzed data and  
3 wrote the manuscript. EA: Performed RNA sequencing analysis for iPSC-MG and human  
4 postmortem tissue. JL: Differentiated and maintained iPSC-MG. LMG, BER: Acquired data and  
5 performed quantitative microscope image analysis. DL, LB, JS, TAM, TFG: Performed and  
6 analyzed experiments. MT, AL, JR: Performed experiments. SM: confocal imaging. CB:  
7 Maintained and expanded iPSCs. RP: Manuscript editing. FBG, SA: Provided *C9orf72* iPSC  
8 lines. MBJ, AM: Taught first-hand iPSC-MG protocol. TSJ: Provided hSN-rodo. RB, RHB:  
9 Provided suggestions and evaluation of our work. KKJ: Designed experiments, provided critical  
10 advice and evaluation of our work. RS: Designed experiments, oversaw data analysis and  
11 interpretation and participated in manuscript writing, drafting and editing.

## 12 **Funding**

13 This research was supported by the National Institute on Aging of the National Institutes of  
14 Health on the Award Number P30AG019610 (RS). The content is solely the responsibility of the  
15 authors and does not necessarily represent the official views of the National Institute of Health.  
16 This work was further supported in part by a grant to Cedars-Sinai Medical Center from the  
17 Howard Hughes Medical Institute through the James H. Gilliam Fellowships for Advanced Study  
18 program. In addition, support was provided through funds by The Robert Packard Center for  
19 ALS Research (RS), Barrow Neurological Foundation (RS; RB), The David E. Reese Family  
20 Foundation and the George Flaccus Laboratory at TGen for ALS Research (KKJ), Barrow  
21 Neurological Foundation postdoctoral fellowship (IL), The Fein Family Foundation (RS; RB), the  
22 European Research Council (ERC) under the European Union's Horizon 2020 research and

1 innovation programme (Grant agreement No. 681181; TSJ), the UK Dementia Research Institute  
2 (which receives its funding from DRI Ltd, funded by the UK Medical Research Council,  
3 Alzheimer's Society, and Alzheimer's Research UK; TSJ), U.S. Department of Veterans Affairs  
4 I01BX003625 (Subaward to RS), NIH/NINDS RO1NS101986 (FBG), NIH/NINDS,  
5 RO1NS097545 (RHB), NIH/NINDS T32 NS082174 (AM).

## 6 **Availability of data and materials**

7 The iPSC-MG and iPSC-CN datasets used and/or analyzed during the current study are  
8 available from the corresponding author on reasonable request. All RNA-seq expression data  
9 from bulk brain tissue are available through Target ALS/New York Genome Center  
10 (<http://www.targetals.org/research/resources-for-scientists/resource-genomic-data-sets/>).

## 11 **Ethics approval and consent to participate**

12 Human postmortem tissues for immunohistochemistry experiments were obtained from the  
13 Target ALS human postmortem tissue core, which was collected under Target ALS approved  
14 patient consent and IRB protocol. Working with de-identified tissues was exempt by the Dignity  
15 Health Research Compliance office. For the preparation of human tissue synaptoneurosome,  
16 the use of human tissue for post-mortem studies has been reviewed and approved by the  
17 Edinburgh Brain Bank ethics committee and the ACCORD medical research ethics committee,  
18 AMREC (approval number 15-HV-016; ACCORD is the Academic and Clinical Central Office for  
19 Research and Development, a joint office of the University of Edinburgh and NHS Lothian). The  
20 Edinburgh Brain Bank is a Medical Research Council funded facility with research ethics  
21 committee (REC) approval (11/ES/0022).

## 22 **Consent for publication**

1 All authors read and approved the final manuscript.

## 2 **Competing Interests**

3 The authors declare no competing interests.

4

## 5 **References**

6

- 7 1. DeJesus-Hernandez M, Mackenzie IR, Boeve BF, Boxer AL, Baker M, Rutherford NJ, et al.  
8 Expanded GGGGCC hexanucleotide repeat in noncoding region of C9ORF72 causes chromosome 9p-  
9 linked FTD and ALS. *Neuron*. 2011;72(2):245-56.
- 10 2. Renton AE, Majounie E, Waite A, Simon-Sanchez J, Rollinson S, Gibbs JR, et al. A  
11 hexanucleotide repeat expansion in C9ORF72 is the cause of chromosome 9p21-linked ALS-FTD.  
12 *Neuron*. 2011;72(2):257-68.
- 13 3. Josephs KA, Murray ME, Whitwell JL, Tosakulwong N, Weigand SD, Petrucelli L, et al. Updated  
14 TDP-43 in Alzheimer's disease staging scheme. *Acta Neuropathol*. 2016;131(4):571-85.
- 15 4. Neumann M, Sampathu DM, Kwong LK, Truax AC, Micsenyi MC, Chou TT, et al. Ubiquitinated  
16 TDP-43 in frontotemporal lobar degeneration and amyotrophic lateral sclerosis. *Science*.  
17 2006;314(5796):130-3.
- 18 5. Ling SC, Polymenidou M, Cleveland DW. Converging mechanisms in ALS and FTD: disrupted  
19 RNA and protein homeostasis. *Neuron*. 2013;79(3):416-38.
- 20 6. Lagier-Tourenne C, Polymenidou M, Cleveland DW. TDP-43 and FUS/TLS: emerging roles in  
21 RNA processing and neurodegeneration. *Hum Mol Genet*. 2010;19(R1):R46-64.
- 22 7. Nakashima-Yasuda H, Uryu K, Robinson J, Xie SX, Hurtig H, Duda JE, et al. Co-morbidity of  
23 TDP-43 proteinopathy in Lewy body related diseases. *Acta Neuropathol*. 2007;114(3):221-9.

- 1 8. Uryu K, Nakashima-Yasuda H, Forman MS, Kwong LK, Clark CM, Grossman M, et al.  
2 Concomitant TAR-DNA-binding protein 43 pathology is present in Alzheimer disease and corticobasal  
3 degeneration but not in other tauopathies. *J Neuropathol Exp Neurol.* 2008;67(6):555-64.
- 4 9. Ilieva H, Polymenidou M, Cleveland DW. Non-cell autonomous toxicity in neurodegenerative  
5 disorders: ALS and beyond. *J Cell Biol.* 2009;187(6):761-72.
- 6 10. Yamanaka K, Chun SJ, Boillee S, Fujimori-Tonou N, Yamashita H, Gutmann DH, et al. Astrocytes  
7 as determinants of disease progression in inherited amyotrophic lateral sclerosis. *Nat Neurosci.*  
8 2008;11(3):251-3.
- 9 11. Haidet-Phillips AM, Hester ME, Miranda CJ, Meyer K, Braun L, Frakes A, et al. Astrocytes from  
10 familial and sporadic ALS patients are toxic to motor neurons. *Nat Biotechnol.* 2011;29(9):824-8.
- 11 12. Barbeito LH, Pehar M, Cassina P, Vargas MR, Peluffo H, Viera L, et al. A role for astrocytes in  
12 motor neuron loss in amyotrophic lateral sclerosis. *Brain Res Brain Res Rev.* 2004;47(1-3):263-74.
- 13 13. Brites D, Vaz AR. Microglia centered pathogenesis in ALS: insights in cell interconnectivity. *Front*  
14 *Cell Neurosci.* 2014;8:117.
- 15 14. Frakes AE, Ferraiuolo L, Haidet-Phillips AM, Schmelzer L, Braun L, Miranda CJ, et al. Microglia  
16 induce motor neuron death via the classical NF-kappaB pathway in amyotrophic lateral sclerosis. *Neuron.*  
17 2014;81(5):1009-23.
- 18 15. Yamanaka K, Yamashita H. [ALS and microglia--a player for non-cell-autonomous neuron death].  
19 *Brain Nerve.* 2007;59(10):1163-70.
- 20 16. Kang SH, Li Y, Fukaya M, Lorenzini I, Cleveland DW, Ostrow LW, et al. Degeneration and  
21 impaired regeneration of gray matter oligodendrocytes in amyotrophic lateral sclerosis. *Nat Neurosci.*  
22 2013;16(5):571-9.
- 23 17. Prinz M, Jung S, Priller J. Microglia Biology: One Century of Evolving Concepts. *Cell.*  
24 2019;179(2):292-311.



- 1 18. Masuda T, Sankowski R, Staszewski O, Prinz M. Microglia Heterogeneity in the Single-Cell Era.  
2 Cell Rep. 2020;30(5):1271-81.
- 3 19. Colonna M, Butovsky O. Microglia Function in the Central Nervous System During Health and  
4 Neurodegeneration. Annu Rev Immunol. 2017;35:441-68.
- 5 20. Bilbo S, Stevens B. Microglia: The Brain's First Responders. Cerebrum. 2017;2017.
- 6 21. Hammond TR, Robinton D, Stevens B. Microglia and the Brain: Complementary Partners in  
7 Development and Disease. Annu Rev Cell Dev Biol. 2018;34:523-44.
- 8 22. Salter MW, Stevens B. Microglia emerge as central players in brain disease. Nat Med.  
9 2017;23(9):1018-27.
- 10 23. Stevens B, Schafer DP. Roles of microglia in nervous system development, plasticity, and  
11 disease. Dev Neurobiol. 2018;78(6):559-60.
- 12 24. Lall D, Baloh RH. Microglia and C9orf72 in neuroinflammation and ALS and frontotemporal  
13 dementia. J Clin Invest. 2017;127(9):3250-8.
- 14 25. Rostalski H, Leskela S, Huber N, Katisko K, Cajanus A, Solje E, et al. Astrocytes and Microglia  
15 as Potential Contributors to the Pathogenesis of C9orf72 Repeat Expansion-Associated FTLD and ALS.  
16 Frontiers in neuroscience. 2019;13:486.
- 17 26. Trageser KJ, Smith C, Herman FJ, Ono K, Pasinetti GM. Mechanisms of Immune Activation by  
18 c9orf72-Expansions in Amyotrophic Lateral Sclerosis and Frontotemporal Dementia. Frontiers in  
19 neuroscience. 2019;13:1298.
- 20 27. Radford RA, Morsch M, Rayner SL, Cole NJ, Pountney DL, Chung RS. The established and  
21 emerging roles of astrocytes and microglia in amyotrophic lateral sclerosis and frontotemporal dementia.  
22 Front Cell Neurosci. 2015;9:414.
- 23 28. Brettschneider J, Toledo JB, Van Deerlin VM, Elman L, McCluskey L, Lee VM, et al. Microglial  
24 activation correlates with disease progression and upper motor neuron clinical symptoms in amyotrophic  
25 lateral sclerosis. PLoS One. 2012;7(6):e39216.

- 1 29. Brettschneider J, Libon DJ, Toledo JB, Xie SX, McCluskey L, Elman L, et al. Microglial activation  
2 and TDP-43 pathology correlate with executive dysfunction in amyotrophic lateral sclerosis. *Acta*  
3 *Neuropathol.* 2012;123(3):395-407.
- 4 30. O'Rourke JG, Bogdanik L, Yanez A, Lall D, Wolf AJ, Muhammad AK, et al. C9orf72 is required  
5 for proper macrophage and microglial function in mice. *Science.* 2016;351(6279):1324-9.
- 6 31. Sakae N, Roemer SF, Bieniek KF, Murray ME, Baker MC, Kasanuki K, et al. Microglia in  
7 frontotemporal lobar degeneration with progranulin or C9ORF72 mutations. *Ann Clin Transl Neurol.*  
8 2019;6(9):1782-96.
- 9 32. Baker M, Mackenzie IR, Pickering-Brown SM, Gass J, Rademakers R, Lindholm C, et al.  
10 Mutations in progranulin cause tau-negative frontotemporal dementia linked to chromosome 17. *Nature.*  
11 2006;442(7105):916-9.
- 12 33. Mizielińska S, Lashley T, Norona FE, Clayton EL, Ridler CE, Fratta P, et al. C9orf72  
13 frontotemporal lobar degeneration is characterised by frequent neuronal sense and antisense RNA foci.  
14 *Acta Neuropathol.* 2013;126(6):845-57.
- 15 34. Clement AM, Nguyen MD, Roberts EA, Garcia ML, Boillee S, Rule M, et al. Wild-type nonneuronal  
16 cells extend survival of SOD1 mutant motor neurons in ALS mice. *Science.* 2003;302(5642):113-7.
- 17 35. Boillee S, Vande Velde C, Cleveland DW. ALS: a disease of motor neurons and their nonneuronal  
18 neighbors. *Neuron.* 2006;52(1):39-59.
- 19 36. Batra R, Lee CW. Mouse Models of C9orf72 Hexanucleotide Repeat Expansion in Amyotrophic  
20 Lateral Sclerosis/ Frontotemporal Dementia. *Frontiers in cellular neuroscience.* 2017;11:196.
- 21 37. Jiang J, Zhu Q, Gendron TF, Saberi S, McAlonis-Downes M, Seelman A, et al. Gain of Toxicity  
22 from ALS/FTD-Linked Repeat Expansions in C9ORF72 Is Alleviated by Antisense Oligonucleotides  
23 Targeting GGGGCC-Containing RNAs. *Neuron.* 2016;90(3):535-50.

- 1 38. Burberry A, Suzuki N, Wang JY, Moccia R, Mordes DA, Stewart MH, et al. Loss-of-function  
2 mutations in the C9ORF72 mouse ortholog cause fatal autoimmune disease. *Sci Transl Med.*  
3 2016;8(347):347ra93.
- 4 39. Prudencio M, Belzil VV, Batra R, Ross CA, Gendron TF, Pregent LJ, et al. Distinct brain  
5 transcriptome profiles in C9orf72-associated and sporadic ALS. *Nat Neurosci.* 2015;18(8):1175-82.
- 6 40. Lagier-Tourenne C, Baughn M, Rigo F, Sun S, Liu P, Li HR, et al. Targeted degradation of sense  
7 and antisense C9orf72 RNA foci as therapy for ALS and frontotemporal degeneration. *Proceedings of*  
8 *the National Academy of Sciences of the United States of America.* 2013.
- 9 41. Zhou Q, Mareljic N, Michaelsen M, Parhizkar S, Heindl S, Nuscher B, et al. Active poly-GA  
10 vaccination prevents microglia activation and motor deficits in a C9orf72 mouse model. *EMBO Mol Med.*  
11 2020;12(2):e10919.
- 12 42. Sellgren CM, Sheridan SD, Gracias J, Xuan D, Fu T, Perlis RH. Patient-specific models of  
13 microglia-mediated engulfment of synapses and neural progenitors. *Mol Psychiatry.* 2017;22(2):170-7.
- 14 43. Murai N, Mitalipova M, Jaenisch R. Functional analysis of CX3CR1 in human induced pluripotent  
15 stem (iPS) cell-derived microglia-like cells. *Eur J Neurosci.* 2020.
- 16 44. Andreone BJ, Przybyla L, Llapashtica C, Rana A, Davis SS, van Lengerich B, et al. Alzheimer's-  
17 associated PLCgamma2 is a signaling node required for both TREM2 function and the inflammatory  
18 response in human microglia. *Nat Neurosci.* 2020;23(8):927-38.
- 19 45. Butler Iii RR, Kozlova A, Zhang H, Zhang S, Streit M, Sanders AR, et al. The Genetic Relevance  
20 of Human Induced Pluripotent Stem Cell-Derived Microglia to Alzheimer's Disease and Major  
21 Neuropsychiatric Disorders. *Mol Neuropsychiatry.* 2020;5(Suppl 1):85-96.
- 22 46. Sabogal-Guaqueta AM, Marmolejo-Garza A, de Padua VP, Eggen B, Boddeke E, Dolga AM.  
23 Microglia alterations in neurodegenerative diseases and their modeling with human induced pluripotent  
24 stem cell and other platforms. *Prog Neurobiol.* 2020;190:101805.

- 1 47. Hasselmann J, Blurton-Jones M. Human iPSC-derived microglia: A growing toolset to study the  
2 brain's innate immune cells. *Glia*. 2020;68(4):721-39.
- 3 48. Nugent AA, Lin K, van Lengerich B, Lianoglou S, Przybyla L, Davis SS, et al. TREM2 Regulates  
4 Microglial Cholesterol Metabolism upon Chronic Phagocytic Challenge. *Neuron*. 2020;105(5):837-54 e9.
- 5 49. Geirsdottir L, David E, Keren-Shaul H, Weiner A, Bohlen SC, Neuber J, et al. Cross-Species  
6 Single-Cell Analysis Reveals Divergence of the Primate Microglia Program. *Cell*. 2019;179(7):1609-22  
7 e16.
- 8 50. Galatro TF, Holtman IR, Lerario AM, Vainchtein ID, Brouwer N, Sola PR, et al. Transcriptomic  
9 analysis of purified human cortical microglia reveals age-associated changes. *Nat Neurosci*.  
10 2017;20(8):1162-71.
- 11 51. Smith AM, Dragunow M. The human side of microglia. *Trends Neurosci*. 2014;37(3):125-35.
- 12 52. Gosselin D, Skola D, Coufal NG, Holtman IR, Schlachetzki JCM, Sajti E, et al. An environment-  
13 dependent transcriptional network specifies human microglia identity. *Science*. 2017;356(6344).
- 14 53. McQuade A, Coburn M, Tu CH, Hasselmann J, Davtyan H, Blurton-Jones M. Development and  
15 validation of a simplified method to generate human microglia from pluripotent stem cells. *Mol*  
16 *Neurodegener*. 2018;13(1):67.
- 17 54. Butovsky O, Jedrychowski MP, Moore CS, Cialic R, Lanser AJ, Gabriely G, et al. Identification of  
18 a unique TGF-beta-dependent molecular and functional signature in microglia. *Nat Neurosci*.  
19 2014;17(1):131-43.
- 20 55. Greter M, Lelios I, Pelczar P, Hoeffel G, Price J, Leboeuf M, et al. Stroma-derived interleukin-34  
21 controls the development and maintenance of langerhans cells and the maintenance of microglia.  
22 *Immunity*. 2012;37(6):1050-60.
- 23 56. Wang Y, Szretter KJ, Vermi W, Gilfillan S, Rossini C, Cella M, et al. IL-34 is a tissue-restricted  
24 ligand of CSF1R required for the development of Langerhans cells and microglia. *Nat Immunol*.  
25 2012;13(8):753-60.

- 1 57. Abud EM, Ramirez RN, Martinez ES, Healy LM, Nguyen CHH, Newman SA, et al. iPSC-Derived  
2 Human Microglia-like Cells to Study Neurological Diseases. *Neuron*. 2017;94(2):278-93 e9.
- 3 58. Pandya H, Shen MJ, Ichikawa DM, Sedlock AB, Choi Y, Johnson KR, et al. Differentiation of  
4 human and murine induced pluripotent stem cells to microglia-like cells. *Nat Neurosci*. 2017;20(5):753-  
5 9.
- 6 59. Abutbul S, Shapiro J, Szaingurten-Solodkin I, Levy N, Carmy Y, Baron R, et al. TGF-beta signaling  
7 through SMAD2/3 induces the quiescent microglial phenotype within the CNS environment. *Glia*.  
8 2012;60(7):1160-71.
- 9 60. Chen S, Luo D, Streit WJ, Harrison JK. TGF-beta1 upregulates CX3CR1 expression and inhibits  
10 fractalkine-stimulated signaling in rat microglia. *J Neuroimmunol*. 2002;133(1-2):46-55.
- 11 61. Elmore MR, Najafi AR, Koike MA, Dagher NN, Spangenberg EE, Rice RA, et al. Colony-  
12 stimulating factor 1 receptor signaling is necessary for microglia viability, unmasking a microglia  
13 progenitor cell in the adult brain. *Neuron*. 2014;82(2):380-97.
- 14 62. Barclay AN, Wright GJ, Brooke G, Brown MH. CD200 and membrane protein interactions in the  
15 control of myeloid cells. *Trends Immunol*. 2002;23(6):285-90.
- 16 63. Kim KW, Vallon-Eberhard A, Zigmond E, Farache J, Shezen E, Shakhar G, et al. In vivo  
17 structure/function and expression analysis of the CX3C chemokine fractalkine. *Blood*.  
18 2011;118(22):e156-67.
- 19 64. Kierdorf K, Prinz M. Factors regulating microglia activation. *Front Cell Neurosci*. 2013;7:44.
- 20 65. Renton AE, Majounie E, Waite A, Simon-Sanchez J, Rollinson S, Gibbs JR, et al. A  
21 hexanucleotide repeat expansion in C9ORF72 is the cause of chromosome 9p21-linked ALS-FTD.  
22 *Neuron*. 2011;72(2):257-68.
- 23 66. Paolicelli RC, Jawaid A, Henstridge CM, Valeri A, Merlini M, Robinson JL, et al. TDP-43 Depletion  
24 in Microglia Promotes Amyloid Clearance but Also Induces Synapse Loss. *Neuron*. 2017;95(2):297-308  
25 e6.

- 1 67. Hesse R, Hurtado ML, Jackson RJ, Eaton SL, Herrmann AG, Colom-Cadena M, et al.  
2 Comparative profiling of the synaptic proteome from Alzheimer's disease patients with focus on the APOE  
3 genotype. *Acta Neuropathol Commun.* 2019;7(1):214.
- 4 68. Tzioras M, Daniels MJD, King D, Popovic K, Holloway RK, Stevenson AJ, et al. Altered synaptic  
5 ingestion by human microglia in Alzheimer's disease. *BioRxiv.* 2019.
- 6 69. Balez R, Steiner N, Engel M, Munoz SS, Lum JS, Wu Y, et al. Neuroprotective effects of apigenin  
7 against inflammation, neuronal excitability and apoptosis in an induced pluripotent stem cell model of  
8 Alzheimer's disease. *Scientific reports.* 2016;6:31450.
- 9 70. Muffat J, Li Y, Yuan B, Mitalipova M, Omer A, Corcoran S, et al. Efficient derivation of microglia-  
10 like cells from human pluripotent stem cells. *Nat Med.* 2016;22(11):1358-67.
- 11 71. Zhang Y, Chen K, Sloan SA, Bennett ML, Scholze AR, O'Keefe S, et al. An RNA-sequencing  
12 transcriptome and splicing database of glia, neurons, and vascular cells of the cerebral cortex. *J Neurosci.*  
13 2014;34(36):11929-47.
- 14 72. Sareen D, O'Rourke JG, Meera P, Muhammad AK, Grant S, Simpkinson M, et al. Targeting RNA  
15 foci in iPSC-derived motor neurons from ALS patients with a C9ORF72 repeat expansion. *Sci Transl*  
16 *Med.* 2013;5(208):208ra149.
- 17 73. Lagier-Tourenne C, Baughn M, Rigo F, Sun S, Liu P, Li HR, et al. Targeted degradation of sense  
18 and antisense C9orf72 RNA foci as therapy for ALS and frontotemporal degeneration. *Proc Natl Acad*  
19 *Sci U S A.* 2013;110(47):E4530-9.
- 20 74. Mackenzie IR, Arzberger T, Kremmer E, Troost D, Lorenzl S, Mori K, et al. Dipeptide repeat  
21 protein pathology in C9ORF72 mutation cases: clinico-pathological correlations. *Acta Neuropathol.*  
22 2013;126(6):859-79.
- 23 75. Ash PE, Bieniek KF, Gendron TF, Caulfield T, Lin WL, DeJesus-Hernandez M, et al.  
24 Unconventional translation of C9ORF72 GGGGCC expansion generates insoluble polypeptides specific  
25 to c9FTD/ALS. *Neuron.* 2013;77(4):639-46.

- 1 76. Zhao C, Devlin AC, Chouhan AK, Selvaraj BT, Stavrou M, Burr K, et al. Mutant C9orf72 human  
2 iPSC-derived astrocytes cause non-cell autonomous motor neuron pathophysiology. *Glia*.  
3 2020;68(5):1046-64.
- 4 77. Donnelly CJ, Zhang PW, Pham JT, Haeusler AR, Mistry NA, Vidensky S, et al. RNA toxicity from  
5 the ALS/FTD C9ORF72 expansion is mitigated by antisense intervention. *Neuron*. 2013;80(2):415-28.
- 6 78. Zhang YJ, Gendron TF, Grima JC, Sasaguri H, Jansen-West K, Xu YF, et al. C9ORF72 poly(GA)  
7 aggregates sequester and impair HR23 and nucleocytoplasmic transport proteins. *Nat Neurosci*.  
8 2016;19(5):668-77.
- 9 79. Freibaum BD, Taylor JP. The Role of Dipeptide Repeats in C9ORF72-Related ALS-FTD. *Front*  
10 *Mol Neurosci*. 2017;10:35.
- 11 80. Gendron TF, Chew J, Stankowski JN, Hayes LR, Zhang YJ, Prudencio M, et al. Poly(GP) proteins  
12 are a useful pharmacodynamic marker for C9ORF72-associated amyotrophic lateral sclerosis. *Sci Transl*  
13 *Med*. 2017;9(383).
- 14 81. Jiang J, Cleveland DW. Bidirectional Transcriptional Inhibition as Therapy for ALS/FTD Caused  
15 by Repeat Expansion in C9orf72. *Neuron*. 2016;92(6):1160-3.
- 16 82. O'Rourke JG, Bogdanik L, Muhammad A, Gendron TF, Kim KJ, Austin A, et al. C9orf72 BAC  
17 Transgenic Mice Display Typical Pathologic Features of ALS/FTD. *Neuron*. 2015;88(5):892-901.
- 18 83. Zu T, Liu Y, Banez-Coronel M, Reid T, Pletnikova O, Lewis J, et al. RAN proteins and RNA foci  
19 from antisense transcripts in C9ORF72 ALS and frontotemporal dementia. *Proceedings of the National*  
20 *Academy of Sciences of the United States of America*. 2013.
- 21 84. Andrade NS, Ramic M, Esanov R, Liu W, Rybin MJ, Gaidosh G, et al. Dipeptide repeat proteins  
22 inhibit homology-directed DNA double strand break repair in C9ORF72 ALS/FTD. *Mol Neurodegener*.  
23 2020;15(1):13.
- 24 85. Cooper-Knock J, Hewitt C, Highley JR, Brockington A, Milano A, Man S, et al. Clinico-pathological  
25 features in amyotrophic lateral sclerosis with expansions in C9ORF72. *Brain*. 2012;135(Pt 3):751-64.

- 1 86. Al-Sarraj S, King A, Troakes C, Smith B, Maekawa S, Bodi I, et al. p62 positive, TDP-43 negative,  
2 neuronal cytoplasmic and intranuclear inclusions in the cerebellum and hippocampus define the  
3 pathology of C9orf72-linked FTLN and MND/ALS. *Acta Neuropathol.* 2011;122(6):691-702.
- 4 87. Schipper LJ, Raaphorst J, Aronica E, Baas F, de Haan R, de Visser M, et al. Prevalence of brain  
5 and spinal cord inclusions, including dipeptide repeat proteins, in patients with the C9ORF72  
6 hexanucleotide repeat expansion: a systematic neuropathological review. *Neuropathol Appl Neurobiol.*  
7 2016;42(6):547-60.
- 8 88. Moore S, Rabichow BE, Sattler R. The Hitchhiker's Guide to Nucleocytoplasmic Trafficking in  
9 Neurodegeneration. *Neurochem Res.* 2020;45(6):1306-27.
- 10 89. Zhang K, Donnelly CJ, Haeusler AR, Grima JC, Machamer JB, Steinwald P, et al. The C9orf72  
11 repeat expansion disrupts nucleocytoplasmic transport. *Nature.* 2015;525(7567):56-61.
- 12 90. Chou CC, Zhang Y, Umoh ME, Vaughan SW, Lorenzini I, Liu F, et al. TDP-43 pathology disrupts  
13 nuclear pore complexes and nucleocytoplasmic transport in ALS/FTD. *Nat Neurosci.* 2018;21(2):228-39.
- 14 91. Moore S, Alsop E, Lorenzini I, Starr A, Rabichow BE, Mendez E, et al. ADAR2 mislocalization  
15 and widespread RNA editing aberrations in C9orf72-mediated ALS/FTD. *Acta Neuropathol.*  
16 2019;138(1):49-65.
- 17 92. Smith JA, Das A, Ray SK, Banik NL. Role of pro-inflammatory cytokines released from microglia  
18 in neurodegenerative diseases. *Brain Res Bull.* 2012;87(1):10-20.
- 19 93. Moreno-Martinez L, Calvo AC, Munoz MJ, Osta R. Are Circulating Cytokines Reliable Biomarkers  
20 for Amyotrophic Lateral Sclerosis? *Int J Mol Sci.* 2019;20(11).
- 21 94. Olesen MN, Wuolikainen A, Nilsson AC, Wirenfeldt M, Forsberg K, Madsen JS, et al. Inflammatory  
22 profiles relate to survival in subtypes of amyotrophic lateral sclerosis. *Neurol Neuroimmunol*  
23 *Neuroinflamm.* 2020;7(3).
- 24 95. McCauley ME, Baloh RH. Inflammation in ALS/FTD pathogenesis. *Acta Neuropathol.*  
25 2019;137(5):715-30.



- 1 96. Beers DR, Appel SH. Immune dysregulation in amyotrophic lateral sclerosis: mechanisms and  
2 emerging therapies. *Lancet Neurol.* 2019;18(2):211-20.
- 3 97. Paresce DM, Ghosh RN, Maxfield FR. Microglial cells internalize aggregates of the Alzheimer's  
4 disease amyloid beta-protein via a scavenger receptor. *Neuron.* 1996;17(3):553-65.
- 5 98. Stevens B, Allen NJ, Vazquez LE, Howell GR, Christopherson KS, Nouri N, et al. The classical  
6 complement cascade mediates CNS synapse elimination. *Cell.* 2007;131(6):1164-78.
- 7 99. Bialas AR, Stevens B. TGF-beta signaling regulates neuronal C1q expression and developmental  
8 synaptic refinement. *Nature neuroscience.* 2013;16(12):1773-82.
- 9 100. Tremblay ME, Stevens B, Sierra A, Wake H, Bessis A, Nimmerjahn A. The role of microglia in the  
10 healthy brain. *J Neurosci.* 2011;31(45):16064-9.
- 11 101. Hong S, Beja-Glasser VF, Nfonoyim BM, Frouin A, Li S, Ramakrishnan S, et al. Complement and  
12 microglia mediate early synapse loss in Alzheimer mouse models. *Science.* 2016;352(6286):712-6.
- 13 102. Lui H, Zhang J, Makinson SR, Cahill MK, Kelley KW, Huang HY, et al. Progranulin Deficiency  
14 Promotes Circuit-Specific Synaptic Pruning by Microglia via Complement Activation. *Cell.*  
15 2016;165(4):921-35.
- 16 103. Colom-Cadena M, Spires-Jones T, Zetterberg H, Blennow K, Caggiano A, DeKosky ST, et al. The  
17 clinical promise of biomarkers of synapse damage or loss in Alzheimer's disease. *Alzheimers Res Ther.*  
18 2020;12(1):21.
- 19 104. Henstridge CM, Pickett E, Spires-Jones TL. Synaptic pathology: a shared mechanism in  
20 neurological disease. *Ageing Res Rev.* 2016.
- 21 105. Levine TP, Daniels RD, Gatta AT, Wong LH, Hayes MJ. The product of C9orf72, a gene strongly  
22 implicated in neurodegeneration, is structurally related to DENN Rab-GEFs. *Bioinformatics.*  
23 2013;29(4):499-503.

- 1 106. Aoki Y, Manzano R, Lee Y, Dafinca R, Aoki M, Douglas AGL, et al. C9orf72 and RAB7L1 regulate  
2 vesicle trafficking in amyotrophic lateral sclerosis and frontotemporal dementia. *Brain*. 2017;140(4):887-  
3 97.
- 4 107. Farg MA, Sundaramoorthy V, Sultana JM, Yang S, Atkinson RA, Levina V, et al. C9ORF72,  
5 implicated in amyotrophic lateral sclerosis and frontotemporal dementia, regulates endosomal trafficking.  
6 *Hum Mol Genet*. 2014;23(13):3579-95.
- 7 108. Shi Y, Lin S, Staats KA, Li Y, Chang WH, Hung ST, et al. Haploinsufficiency leads to  
8 neurodegeneration in C9ORF72 ALS/FTD human induced motor neurons. *Nat Med*. 2018;24(3):313-25.
- 9 109. Umoh ME, Dammer EB, Dai J, Duong DM, Lah JJ, Levey AI, et al. A proteomic network approach  
10 across the ALS-FTD disease spectrum resolves clinical phenotypes and genetic vulnerability in human  
11 brain. *EMBO Mol Med*. 2018;10(1):48-62.
- 12 110. Ban J, Samano C, Mladinic M, Munitic I. Glia in amyotrophic lateral sclerosis and spinal cord  
13 injury: common therapeutic targets. *Croat Med J*. 2019;60(2):109-20.
- 14 111. Filipi T, Hermanova Z, Tureckova J, Vanatko O, Anderova AM. Glial Cells-The Strategic Targets  
15 in Amyotrophic Lateral Sclerosis Treatment. *J Clin Med*. 2020;9(1).
- 16 112. Valori CF, Guidotti G, Brambilla L, Rossi D. Astrocytes in Motor Neuron Diseases. *Adv Exp Med*  
17 *Biol*. 2019;1175:227-72.
- 18 113. Dols-Icardo O, Montal V, Sirisi S, Lopez-Pernas G, Cervera-Carles L, Querol-Vilaseca M, et al.  
19 Motor cortex transcriptome reveals microglial key events in amyotrophic lateral sclerosis. *Neurol*  
20 *Neuroimmunol Neuroinflamm*. 2020;7(5).
- 21 114. Tam OH, Rozhkov NV, Shaw R, Kim D, Hubbard I, Fennessey S, et al. Postmortem Cortex  
22 Samples Identify Distinct Molecular Subtypes of ALS: Retrotransposon Activation, Oxidative Stress, and  
23 Activated Glia. *Cell Rep*. 2019;29(5):1164-77 e5.

- 1 115. D'Erchia AM, Gallo A, Manzari C, Raho S, Horner DS, Chiara M, et al. Massive transcriptome  
2 sequencing of human spinal cord tissues provides new insights into motor neuron degeneration in ALS.  
3 *Sci Rep.* 2017;7(1):10046.
- 4 116. Keren-Shaul H, Spinrad A, Weiner A, Matcovitch-Natan O, Dvir-Szternfeld R, Ulland TK, et al. A  
5 Unique Microglia Type Associated with Restricting Development of Alzheimer's Disease. *Cell.*  
6 2017;169(7):1276-90 e17.
- 7 117. Mrdjen D, Pavlovic A, Hartmann FJ, Schreiner B, Utz SG, Leung BP, et al. High-Dimensional  
8 Single-Cell Mapping of Central Nervous System Immune Cells Reveals Distinct Myeloid Subsets in  
9 Health, Aging, and Disease. *Immunity.* 2018;48(2):380-95 e6.
- 10 118. Bottcher C, Schlickeiser S, Sneeboer MAM, Kunkel D, Knop A, Paza E, et al. Human microglia  
11 regional heterogeneity and phenotypes determined by multiplexed single-cell mass cytometry. *Nat*  
12 *Neurosci.* 2019;22(1):78-90.
- 13 119. Masuda T, Sankowski R, Staszewski O, Bottcher C, Amann L, Sagar, et al. Spatial and temporal  
14 heterogeneity of mouse and human microglia at single-cell resolution. *Nature.* 2019;566(7744):388-92.
- 15 120. Sankowski R, Bottcher C, Masuda T, Geirsdottir L, Sagar, Sindram E, et al. Mapping microglia  
16 states in the human brain through the integration of high-dimensional techniques. *Nat Neurosci.*  
17 2019;22(12):2098-110.
- 18 121. Ajami B, Samusik N, Wieghofer P, Ho PP, Crotti A, Bjornson Z, et al. Single-cell mass cytometry  
19 reveals distinct populations of brain myeloid cells in mouse neuroinflammation and neurodegeneration  
20 models. *Nat Neurosci.* 2018;21(4):541-51.
- 21 122. Friedman BA, Srinivasan K, Ayalon G, Meilandt WJ, Lin H, Huntley MA, et al. Diverse Brain  
22 Myeloid Expression Profiles Reveal Distinct Microglial Activation States and Aspects of Alzheimer's  
23 Disease Not Evident in Mouse Models. *Cell Rep.* 2018;22(3):832-47.

- 1 123. Holtman IR, Raj DD, Miller JA, Schaafsma W, Yin Z, Brouwer N, et al. Induction of a common  
2 microglia gene expression signature by aging and neurodegenerative conditions: a co-expression meta-  
3 analysis. *Acta Neuropathol Commun.* 2015;3:31.
- 4 124. Chiu IM, Morimoto ET, Goodarzi H, Liao JT, O'Keeffe S, Phatnani HP, et al. A neurodegeneration-  
5 specific gene-expression signature of acutely isolated microglia from an amyotrophic lateral sclerosis  
6 mouse model. *Cell Rep.* 2013;4(2):385-401.
- 7 125. Krasemann S, Madore C, Cialic R, Baufeld C, Calcagno N, El Fatimy R, et al. The TREM2-APOE  
8 Pathway Drives the Transcriptional Phenotype of Dysfunctional Microglia in Neurodegenerative  
9 Diseases. *Immunity.* 2017;47(3):566-81 e9.
- 10 126. Spiller KJ, Restrepo CR, Khan T, Dominique MA, Fang TC, Canter RG, et al. Microglia-mediated  
11 recovery from ALS-relevant motor neuron degeneration in a mouse model of TDP-43 proteinopathy. *Nat*  
12 *Neurosci.* 2018;21(3):329-40.
- 13 127. Deczkowska A, Keren-Shaul H, Weiner A, Colonna M, Schwartz M, Amit I. Disease-Associated  
14 Microglia: A Universal Immune Sensor of Neurodegeneration. *Cell.* 2018;173(5):1073-81.
- 15 128. Amick J, Roczniak-Ferguson A, Ferguson SM. C9orf72 binds SMCR8, localizes to lysosomes,  
16 and regulates mTORC1 signaling. *Mol Biol Cell.* 2016;27(20):3040-51.
- 17 129. Amick J, Tharkeshwar AK, Talala G, Ferguson SM. PQLC2 recruits the C9orf72 complex to  
18 lysosomes in response to cationic amino acid starvation. *J Cell Biol.* 2020;219(1).
- 19 130. Sullivan PM, Zhou X, Robins AM, Paushter DH, Kim D, Smolka MB, et al. The ALS/FTLD  
20 associated protein C9orf72 associates with SMCR8 and WDR41 to regulate the autophagy-lysosome  
21 pathway. *Acta Neuropathol Commun.* 2016;4(1):51.
- 22 131. Shao Q, Yang M, Liang C, Ma L, Zhang W, Jiang Z, et al. C9orf72 and smcr8 mutant mice reveal  
23 MTORC1 activation due to impaired lysosomal degradation and exocytosis. *Autophagy.* 2019:1-16.
- 24 132. Amick J, Ferguson SM. C9orf72: At the intersection of lysosome cell biology and  
25 neurodegenerative disease. *Traffic.* 2017;18(5):267-76.

- 1 133. Wang M, Wang H, Tao Z, Xia Q, Hao Z, Prehn JHM, et al. C9orf72 associates with inactive Rag  
2 GTPases and regulates mTORC1-mediated autophagosomal and lysosomal biogenesis. *Aging cell*.  
3 2020:e13126.
- 4 134. Westergard T, Jensen BK, Wen X, Cai J, Kropf E, Iacovitti L, et al. Cell-to-Cell Transmission of  
5 Dipeptide Repeat Proteins Linked to C9orf72-ALS/FTD. *Cell Rep*. 2016;17(3):645-52.
- 6 135. Jovicic A, Mertens J, Boeynaems S, Bogaert E, Chai N, Yamada SB, et al. Modifiers of C9orf72  
7 dipeptide repeat toxicity connect nucleocytoplasmic transport defects to FTD/ALS. *Nat Neurosci*.  
8 2015;18(9):1226-9.
- 9 136. Boeynaems S, Bogaert E, Michiels E, Gijssels I, Sieben A, Jovicic A, et al. Drosophila screen  
10 connects nuclear transport genes to DPR pathology in c9ALS/FTD. *Scientific reports*. 2016;6:20877.
- 11 137. Brettschneider J, Arai K, Del Tredici K, Toledo JB, Robinson JL, Lee EB, et al. TDP-43 pathology  
12 and neuronal loss in amyotrophic lateral sclerosis spinal cord. *Acta Neuropathol*. 2014;128(3):423-37.
- 13 138. Fatima M, Tan R, Halliday GM, Kril JJ. Spread of pathology in amyotrophic lateral sclerosis:  
14 assessment of phosphorylated TDP-43 along axonal pathways. *Acta Neuropathol Commun*. 2015;3:47.
- 15 139. Yamanaka K, Komine O. The multi-dimensional roles of astrocytes in ALS. *Neurosci Res*.  
16 2018;126:31-8.
- 17 140. Swarup V, Phaneuf D, Dupre N, Petri S, Strong M, Kriz J, et al. Deregulation of TDP-43 in  
18 amyotrophic lateral sclerosis triggers nuclear factor kappaB-mediated pathogenic pathways. *J Exp Med*.  
19 2011;208(12):2429-47.
- 20 141. Vatsavayai SC, Yoon SJ, Gardner RC, Gendron TF, Vargas JN, Trujillo A, et al. Timing and  
21 significance of pathological features in C9orf72 expansion-associated frontotemporal dementia. *Brain*.  
22 2016;139(Pt 12):3202-16.
- 23 142. Lu CH, Allen K, Oei F, Leoni E, Kuhle J, Tree T, et al. Systemic inflammatory response and  
24 neuromuscular involvement in amyotrophic lateral sclerosis. *Neurol Neuroimmunol Neuroinflamm*.  
25 2016;3(4):e244.

- 1 143. Bennett ML, Bennett FC, Liddelow SA, Ajami B, Zamanian JL, Fernhoff NB, et al. New tools for  
2 studying microglia in the mouse and human CNS. *Proc Natl Acad Sci U S A*. 2016;113(12):E1738-46.
- 3 144. Liddelow SA, Guttenplan KA, Clarke LE, Bennett FC, Bohlen CJ, Schirmer L, et al. Neurotoxic  
4 reactive astrocytes are induced by activated microglia. *Nature*. 2017;541(7638):481-7.
- 5 145. Liddelow SA, Marsh SE, Stevens B. Microglia and Astrocytes in Disease: Dynamic Duo or  
6 Partners in Crime? *Trends Immunol*. 2020.

7

8

9

10

11

12

13

14

## 15 **Figure Legends**

16

17 **Fig. 1** Healthy control and *C9orf72* ALS/FTD patient iPSC lines differentiate into mature  
18 microglia. (a) Schematic illustration of iPSC-MG differentiation protocol (adapted from (53, 57)).  
19 (b) Phase contrast images of mature iPSC-MG differentiated from healthy control and *C9orf72*  
20 ALS/FTD iPSCs (DIV 40). The representative images show typical ramified microglia  
21 morphology in both experimental groups. Scale bar, 120 $\mu$ m. (c) Representative  
22 immunofluorescence of DIV 40 control (n=5) and *C9orf72* ALS/FTD iPSC-MG (n=7) stained for  
23 myeloid transcription factor PU.1 and microglia specific markers such as purinergic surface

1 receptor P2ry12, C-X3-C Motif Chemokine Receptor 1 (Cx3cr1), triggering receptor expressed  
2 on myeloid cells 2 (TREM2) and the transmembrane protein 119 (TMEM119). See Additional  
3 file: Figure S1a-b. Scale bar, 15 $\mu$ m. (d) Heatmap of the complete iPSC-MG (control, n=4 cell  
4 lines with 1-2 differentiations each and *C9orf72* ALS/FTD, n=7 cell lines with 1-2 differentiations  
5 each) and iPSC-CN (n=12 cell lines with 1-3 differentiations each) transcriptome demonstrating  
6 distinct gene expression profiles between the two cell populations. All iPSC-MG and iPSC-CN  
7 samples were normalized together by DESeq2 and Z-score scaled. (e) Principal component  
8 analysis of the RNA-seq expression data revealed a highly similar gene expression profile within  
9 both iPSC-MG and iPSC-CNs (green cluster) (PC2, 1.66% variance) and confirmed these  
10 populations as distinct from each other (blue cluster) (PC1, 94.87% variance). (f) Normalized  
11 counts for genes associated with microglia, astrocytes, oligo-precursor cells (OPC),  
12 oligodendrocytes, neurons, endothelial cells and pericytes within the iPSC-MG population  
13 (Control n=4 lines; *C9orf72* ALS/FTD n=7 lines). Gene list from (71). Bar graphs are presented  
14 as mean  $\pm$  SD. Heatmaps were generated using z-scores calculated from DESeq2 normalized  
15 gene counts. Principal component analysis was done using DESeq2 normalized gene counts  
16 with the PCAExplorer package (v. 2.14.1) in R. Bar graphs show normalized gene counts per  
17 iPSC-MG group generated from the RNA sequencing presented as Mean  $\pm$  SD.

18  
19 **Fig. 2** Minor transcriptional changes in *C9orf72* ALS/FTD iPSC-MG and in postmortem tissues  
20 of *C9orf72* ALS/FTD patients. Illumina RNA sequencing analysis was assessed on mature (DIV  
21 40) iPSC-MG for overall gene expression changes and for the presence of dysregulated  
22 microglia-enriched genes, as defined recently (52). Additionally, human motor cortex and frontal

1 cortex RNA sequencing data sets obtained through Target ALS were used to identify  
2 transcriptional changes. **(a)** Volcano plot showing differentially expressed transcripts between  
3 healthy control (n=4) and *C9orf72* ALS/FTD (n=7) from the full iPSC-MG transcriptome  
4 (unadjusted p value <0.005; log<sub>2</sub> fold change (FC) ± 1). **(b)** Volcano plot of differentially  
5 expressed microglia-enriched transcripts indicates that there are no significant expression  
6 changes of these particular genes in mono-cultures of *C9orf72* ALS/FTD iPSC-MG (n=7)  
7 compared to healthy control (n=4) (unadjusted p value <0.005; log<sub>2</sub> fold change (FC) ± 1). **(c-d)**  
8 Existing RNA sequencing data from postmortem autopsy brain tissues (frontal cortex, motor  
9 cortex of *C9orf72* ALS/FTD patients and controls) were also analyzed for differentially expressed  
10 881 microglia-enriched transcripts. Few differentially expressed microglia transcripts in *C9orf72*  
11 ALS/FTD were observed compared to controls (See Additional File 2: Figure S2b-d). Number of  
12 brain tissue samples included in the analyses: frontal cortex (control n=16; *C9orf72* ALS/FTD  
13 n=8), motor cortex (control n=15; *C9orf72* ALS/FTD n=12) and occipital cortex (control n=4;  
14 *C9orf72* ALS/FTD n=5) (unadjusted p value <0.005; log<sub>2</sub> fold change (FC) ± 1). Volcano plots  
15 were generated from DESeq2 output using EnhancedVolcano. All statistical analysis was done  
16 in R (version 3.6.2) using raw counts matrices from featureCounts as input. Low expression  
17 genes were filtered such that genes with mean read counts < 10 were removed from the analysis.  
18 Differential expression analysis was done using DESeq2 (version 1.26.0) using disease status  
19 as the model. Tissue data from Target ALS was downloaded from the New York Genome Center  
20 as raw fastq files and pushed through an identical analysis pipeline as data generated for the  
21 iPSC-MGs.

22



1 **Fig. 3** *C9orf72* ALS/FTD iPSC-MG exhibit reduced *C9orf72* protein expression and produce  
2 poly-(GP) DPR protein. RNA sequencing, qRT-PCR, Western Blots and *C9orf72* protein  
3 immunolabeling were performed to determine changes in *C9orf72* gene and protein expression  
4 levels. In addition, an ELISA assay was used to measure poly-(GP) abundance in iPSC-MG. (a)  
5 Dot plot showing *C9orf72* level of expression as log<sub>2</sub> (counts +1) in control and *C9orf72*  
6 ALS/FTD iPSC-MG (normalized mean count in control, 855.37, n=4 lines; *C9orf72*, 772.08, n=7  
7 lines; p-value = 0.66, Student's t- test). No differences were observed. (b) Relative human  
8 *C9orf72* mRNA expression in control and *C9orf72* ALS/FTD iPSC-MG (normalized to beta-2-  
9 microglobulin (B2M) in control, 0.99, n=3 lines, n=1-4 differentiation per line; *C9orf72*, 1, n=6  
10 lines, n=1-3 differentiation per line; p-value = 0.8; Student's t-test). No differences between  
11 groups were detected. (c) Western blot analysis shows a reduction in human *C9orf72* protein  
12 expression in *C9orf72* ALS/FTD iPSC-MG. 50kDa *C9orf72* protein band highlighted with a green  
13 arrow. (control, n=3 lines, n=1-2 differentiation per line; *C9orf72*, n=5 lines, n=1-2 differentiation  
14 per line). (d) Quantification of *C9orf72* western blot analysis revealed significant reduction in  
15 *C9orf72* protein levels (normalized to tubulin in control, 99.52, n=3 lines, n=1-2 differentiation  
16 per line; *C9orf72*, 60.41, n=5 lines, n=1-2 differentiation per line; p-value = 0.006; Student's t-  
17 test). (e) Immunofluorescence for *C9orf72* protein in iPSC-MG confirms reduced *C9orf72* protein  
18 expression in *C9orf72* microglia. (f) A significant increase in intracellular levels of poly-(GP) was  
19 detected in *C9orf72* ALS/FTD iPSC-MG using an ELISA assay (relative abundance of poly-(GP)  
20 in control, 5.46, n = 3 lines; *C9orf72*, 46.18, n = 7 lines, p=0.0167, two tailed Mann Whitney test).  
21 Data is presented as Median ± SEM for *C9orf72* level expression. Student's t-test was performed

1 for qRT-PCR and WB analysis. Data is presented as Mean  $\pm$  SEM . Two tailed Mann Whitney  
2 test was performed for the poly-(GP) ELISA assay. \*\* $p$ -value  $< 0.01$ , \*  $p$ -value  $< 0.05$ .

3  
4 **Fig. 4** *C9orf72* ALS/FTD iPSC-MG respond with increased cytokine release upon LPS  
5 stimulation. iPSC-MGs were treated with LPS (100ng/ml) for 6hr. The conditioned media was  
6 collected and analyzed for a cytokine/chemokine profile using the V-plex human cytokines kit  
7 (Mesoscale). Under basal conditions, *C9orf72* ALS/FTD iPSC-MG monocultures showed a  
8 significant increase in IL-1 $\alpha$ , IL-6 and TNF- $\alpha$  inflammatory cytokines compared to controls. Upon  
9 LPS stimulation, *C9orf72* ALS/FTD iPSC-MG released higher levels of IL-1 $\alpha$ , IL-1 $\beta$  and IL-6  
10 cytokines than under basal conditions and compared to control iPSC-MG. Data presented as  
11 the concentration of secreted proteins (pg/ml), Mean  $\pm$  SEM, n=2 control lines; n=2 *C9orf72*  
12 lines; \* $p \leq 0.05$ ; \*\* $p \leq 0.01$ ; \*\*\*\* $p \leq 0.0001$ ; multiple t-test corrected for multiple comparison using  
13 Holm-Sidak method.

14  
15 **Fig. 5** *C9orf72* ALS/FTD iPSC-MGs phagocytose A $\beta$  (1-40). iPSC-MG engulf and degrade A $\beta$   
16 (1-40) TAMRA. After a 5 minute treatment with 1 $\mu$ M A $\beta$  (1-40) TAMRA, iPSC-MG were washed,  
17 fixed and immunostained at 5 min, 30 min and 1 h. **(a-b; g-h)** Control and *C9orf72* ALS/FTD  
18 iPSC-MG stained for TREM2 (green) and highlighting A $\beta$  (1-40) TAMRA (red) inside the cells at  
19 the 30 minutes time point. White arrows point at phagocytic cells containing A $\beta$  (1-40) TAMRA  
20 (red). Scale bar, 20 $\mu$ m. **(c, i)** A $\beta$  (1-40) TAMRA (red) internalized by controls and *C9orf72*  
21 ALS/FTD iPSC-MG. *C9orf72* ALS/FTD iPSC-MG have a significant increase in area covered by  
22 A $\beta$  (1-40) compared to control group. Scale bar, 20 $\mu$ m. **(d-e; j-k)** 3D view (scale bar, 15 $\mu$ m) and

1 extended view (**f, l**) showing phagocytic activity in both iPSC-MG groups. Scale bar, 20 $\mu$ m. (**m**)  
2 No changes were observed at 5 minutes (percentage of cell surface area covered by A $\beta$  (1-40)-  
3 TAMRA in control, 18.69, n=2 lines; *C9orf72*, 19.07, n=5 lines; n= 1-2 differentiations per line p  
4 = 0.72 using Student's t-test). A significant reduction in A $\beta$  (1-40) TAMRA clearance was seen  
5 at 30 minutes (percentage of cell surface area covered by A $\beta$  (1-40)-TAMRA in control, 11.8,  
6 n=2 lines; *C9orf72*, 13.20, n=5 lines; n= 1-2 differentiations per line; n = 55-275 cells/ group; \*p  
7 = 0.037 using Student's t-test) and 1 h (percentage of cell surface area covered by A $\beta$  (1-40)-  
8 TAMRA in control, 4.3, n=2 lines; *C9orf72*, 5.2, n=5 lines; n= 1-2 differentiations per line; n = 55-  
9 275 cells/ group; \*p = 0.024 using Student's t-test) in *C9orf72*-iPSC-MGs compared to controls.  
10 (**n**) No differences in cell surface area were observed (area in control, 2020  $\mu$ m<sup>2</sup>, n=2 lines;  
11 *C9orf72*, 2084  $\mu$ m<sup>2</sup>, n=5 lines; n= 1-2 differentiations per line; n = 55-275 cells/ group; p = 0.3  
12 using Student's t-test). Data presented as Mean  $\pm$  SEM, \*p < 0.05; Student's t-test.

13  
14 **Fig. 6** Phagocytic uptake of human brain synaptoneuroosomes by iPSC-MGs. (**a**) Illustration of  
15 iPSC-MGs treated with human brain synaptoneuroosomes. iPSC-MGs (Day 40) are labeled with  
16 nuclear marker Hoechst (cyan) followed by hSN-rodo treatment (orange)  $\pm$  10 $\mu$ M Cytochalasin  
17 D (actin polymerization inhibitor). (**b-e**) Control and (**f-i**) *C9orf72* ALS/FTD iPSC-MG images  
18 taken at 0 h time point using confocal microscopy with differential interference contrast . No  
19 evident phagocytosis of hSN-rodo is seen at this time point (**c, e; g, i**). Scale bars = 50 $\mu$ m. (**j-k**)  
20 Control and (**n-o**) *C9orf72* ALS/FTD iPSC-MG at 2 h show an increase in hSN-rodo fluorescent  
21 signal inside iPSC-MG indicative of phagocytosis and uptake into intracellular acidic  
22 compartments. Scale bar = 40 $\mu$ m. (**l-m; p-q**) Higher magnification representative images

1 highlighting the increase in hSN-rodo signal in individual iPSC-MG at 2 h. Scale bar = 10 $\mu$ m. (r)  
2 Percentage of iPSC-MG engulfing hSN-rodo during the 6 h time course of live imaging. At 2 h,  
3 control and *C9orf72* iPSC-MG showed 69% and 71% phagocytic activity, respectively. No  
4 differences in synaptoneurosome uptake was observed. 10 $\mu$ M cytochalasin D was used as a  
5 negative control to inhibit phagocytic activity in iPSC-MGs (control, n=1 line; *C9orf72*, n=2 lines;  
6 n = 70-115 average cells/ image/ group; n =18 images/group/ time point for hSN-rodo; for  
7 cytochalasin D, n = 70-115 average cells/ image/ group; n =6 images/group/ time point). (s)  
8 Quantification of hSN-rodo mean intensity per cell at 2 h revealed increased uptake in *C9orf72*  
9 ALS/FTD iPSC-MG (control, n=1 line, 1594; *C9orf72*, n=2 lines, 1820; n = 6-10 cells/ image/  
10 group, n = 18 images for 2 h time point; \*p value =0.02, Student's t-test; n = 7-10 cells/ image/  
11 group; for cytochalasin D, control, n=1 line, 845; *C9orf72*, n=2 lines, 1106, n =6 images/group/  
12 time point; \*\*\*p value =0.0007, Student's t-test). Data presented as Mean intensity  $\pm$  SEM, \*\*\*p  
13 value  $\leq$  0.001, \*p-value < 0.05.

14  
15 **Fig. 7** Alterations in early endosomal and lysosomal protein expression in *C9orf72* ALS/FTD  
16 iPSC-MGs. Immunocytochemistry, 3 dimensional image analysis and RNA sequencing were  
17 used to detect changes in endosomal and lysosomal protein and mRNA levels in *C9orf72* iPSC-  
18 MG. (a-b) Outlined 3D cell surface volume of each control and *C9orf72* ALS/FTD iPSC-MGs  
19 stained for EEA1 and DAPI. Scale bar, 20 $\mu$ m. (c) A significant increase in mean fluorescence  
20 intensity of EEA1 was observed in *C9orf72* ALS/FTD iPSC-MGs compared to controls. (control  
21 n=2 lines, 3775 AU, n=90-150 cells per line; *C9orf72*, 4308 AU, n=2 lines, n=100-150 cells per  
22 line; \*\*\*\*p value =0.0001 using Student's t-test). (d-e) Control and *C9orf72* ALS/FTD iPSC-MGs

1 stained for Lamp1 and DAPI. Scale bar, 20 $\mu$ m. (f) A reduction in Lamp1 in *C9orf72* ALS/FTD  
2 iPSC-MGs was observed (mean fluorescence intensity in control n=2 lines, 1328 AU, n=90-150  
3 cells per line; *C9orf72*, n=2 lines, 715.3 AU, n=100-150 cells per line; \*\*\*\*p value =0.0001 using  
4 Student's t-test). (g-h) Merge view of control and *C9orf72* ALS/FTD iPSC-MGs stained for EEA1,  
5 Lamp1 and DAPI. Scale bar, 20 $\mu$ m. (i) No changes in iPSC-MGs cell surface volume was  
6 observed (control n=2 lines, 2050  $\mu$ m<sup>3</sup>, n=90-150 cells per line; *C9orf72*, n=2 lines, 2132  $\mu$ m<sup>3</sup>,  
7 n=100-150 cells per line; p value =0.24 using Student's t-test). (j) No significant changes in  
8 normalized gene counts for endosomal-lysosomal genes in control and *C9orf72* ALS/FTD iPSC-  
9 MGs obtained from RNA seq analyses of unstimulated iPSC-MGs mono-cultures. Data is  
10 presented as the Mean  $\pm$  SEM. Student's t-test, \*\*\*\*p < 0.0001.

11  
12 **Fig. 8** Aberrant EEA1 and Lamp1 expression in microglia in *C9orf72* ALS/FTD patient  
13 postmortem tissues. *C9orf72* ALS/FTD patient postmortem frontal and motor cortex were  
14 immunostained for EEA1 and Lamp1 (Additional File 7: Table S5). (a-b; i-j) Control and *C9orf72*  
15 ALS/FTD microglia stained for Iba-1, EEA1 and DAPI in areas of the frontal and motor cortex of  
16 *C9orf72* ALS/FTD patients. Scale bar, 5 $\mu$ m. (c, k) Extended view image of *C9orf72* ALS/FTD  
17 microglia show EEA1 accumulations inside microglia in both frontal and motor cortex. Scale bar,  
18 5 $\mu$ m. (d, l) A significant increase in EEA1 mean intensity was observed in microglia of the frontal  
19 cortex (mean fluorescence intensity in control, 745200 AU; *C9orf72*, 3160465 AU; n=2 cases  
20 per group, n=28-31 cells/group) and motor cortex (control, 1446909 AU; *C9orf72*, 1692501 AU,  
21 n=2 cases per group, n=29-30 cells per group; Student's t-test; \*p < 0.05, \*\*\*\*p  $\leq$  0.0001). The  
22 increase in EEA1 fluorescence intensity was larger in the frontal cortex compared to the motor

1 cortex. **(e-f; m-n)** Control and *C9orf72* ALS/FTD microglia stained for Iba-1, Lamp1 and DAPI in  
2 areas of the frontal and motor cortex of *C9orf72* ALS/FTD patients. Scale bar, 5 $\mu$ m. **(g,o)**  
3 Extended view image of *C9orf72* ALS/FTD microglia show Lamp1 accumulations inside  
4 microglia in both frontal and motor cortex. Scale bar, 5 $\mu$ m. **(h, p)** A significant increase in Lamp1  
5 mean intensity was also observed in microglia of the frontal cortex (mean fluorescence intensity  
6 in control, 1829123 AU; *C9orf72*, 4344005 AU; n=2 cases per group, n=31-32 cells per group)  
7 and motor cortex (control, 2894860 AU; *C9orf72*, 4559764 AU; n=2 cases per group, n=31-32  
8 cells per group; Student's t-test; \*\*\*\* $p \leq 0.0001$ ). Data is presented as the Mean  $\pm$  SEM.

9

## 10 **Additional Files**

11 **Additional File 1: Figure S1.** Expression of microglia specific genes and protein markers in  
12 control and *C9orf72* ALS/FTD iPSC-derived microglia. **(a)** Percentage of mature healthy control  
13 (n=3-5 lines) and *C9orf72* ALS/FTD (n=3-6 lines) iPSC-MG positive for P2ry12, Cx3cr1, TREM2  
14 and TMEM119 protein markers. **(b)** Dot plots showing the level of expression as Log<sub>2</sub> (counts  
15 +1) of microglia specific genes *sp11* (encodes for myeloid transcription factor PU.1), *p2ry12*,  
16 *cx3cr1*, *TREM2* and *TMEM119* in healthy control and *C9orf72* ALS/FTD (Control, n=4 lines, 1-2  
17 differentiations per line; *C9orf72*, n=7 lines, 1-2 differentiations per line).

18

19 **Additional File 2: Figure S2.** Differentially expressed transcripts in *C9orf72* ALS/FTD versus  
20 control iPSC MG and postmortem tissues. **(a)** Top differentially expressed transcripts in iPSC  
21 MG full transcriptome (unadjusted p value <0.005; log<sub>2</sub> fold change (FC)  $\pm$  1). **(b)** Top microglia-  
22 enriched dysregulated transcripts in the frontal and motor cortex of *C9orf72* ALS/FTD patient

1 tissue from bulk RNA sequencing. **(c)** Volcano plot of differentially expressed microglia-enriched  
2 genes (total of 881 from (52) ) in *C9orf72* ALS/FTD occipital cortex (control, n=4 lines; *C9orf72*,  
3 n=5 lines) (unadjusted p value <0.005; log<sub>2</sub> fold change (FC) ± 1). **(d)** Dysregulated transcripts  
4 in the occipital cortex of *C9orf72* ALS/FTD patient tissue from bulk RNA sequencing. All human  
5 brain RNA sequencing data was taken from Target ALS/NYGC.

6  
7 **Additional File 3: Figure S3.** Differentially expressed genes from the complete transcriptome  
8 of *C9orf72* ALS/FTD patient tissue versus healthy control. **(a-b)** Dysregulated genes in the  
9 frontal and motor cortex of *C9orf72* ALS/FTD patient tissue from bulk RNA sequencing. RNA  
10 sequencing data taken from Target ALS/NYGC.

11  
12 **Additional File 4: Figure S4.** *C9orf72* ALS/FTD iPSC-MG do not present TDP-43 pathology or  
13 mislocalization of ADAR2 to the cytoplasm. **(a)** Western Blot stripped and re-probe for tubulin.  
14 Tubulin was used the internal protein control to normalized human *C9orf72* protein expression.  
15 **(b)** TDP-43 nuclear staining in control and *C9orf72* ALS/FTD iPSC-MG (control and *C9orf72*,  
16 n=2 lines per group, n = 60-84 iPSC-MG cells per line). IPSC-MG cell surface is outlined. Scale  
17 bar 15µm. **(c)** Quantification of TDP-43 nucleocytoplasmic ratio. No evidence of cytoplasmic  
18 accumulations in *C9orf72* ALS/FTD iPSC-MG monocultures (control and *C9orf72* n=2 lines,  
19 n=60-84 cells per line; p= 0.7, Student's t-test). **(d)** Control and *C9orf72* ALS/FTD iPSC-MG  
20 immunostained for anti-ADAR2. IPSC-MG cell surface (white) and nuclear surface (blue) is  
21 outlined. Scale bar 10µm. **(e)** Quantification of ADAR2 nucleocytoplasmic ratio. No evidence of

1 nuclear ADAR2 mislocalization to the cytoplasm was observed in *C9orf72* ALS/FTD iPSC-MG  
2 monocultures (control and *C9orf72* n=2 lines, n=100-115 cells per line; p=0.07, Student's t-test).

3  
4 **Additional File 5: Figure S5.** Human brain synaptoneuroosomes contain PSD95 and  
5 Synaptophysin 38 proteins from pre- and post- synaptic compartments. (a) Western blot analysis  
6 for total homogenate (TH) and synaptoneurosome preparations (SN). Four different SN  
7 preparations (TH1-TH4 and SN1-SN4) from four different control brains frozen samples.  
8 Preparations 1, 3 and 4 had successful enrichment of post-synaptic density 95 (PSD95 – 95kDa)  
9 and synaptophysin (Synaptophysin 38kDa) compared to total homogenate. In addition, low  
10 levels of nuclear marker histone 3 were observed in the SN preparations 1, 3, 4. SN1 (white  
11 arrow; TH1 and SN1) was the preparation used for the present study. (b) PSD95, synaptophysin  
12 38 and Histone 3 quantification for TH and SN preparations 1, 3 and 4. A significant decrease in  
13 Histone 3 levels is observed in all SN preparations, p-value =0.02, Student's t-test.

14  
15 **Additional File 6: Figure S6.** Time lapse imaging of *C9orf72* ALS/FTD iPSC-MG engulfing and  
16 degrading human synaptoneuroosomes pHrodo (hSN-rodo). Selected representative images of  
17 *C9orf72* ALS/FTD iPSC-MG during time lapse live cell imaging of hSN-rodo engulfment. iPSC-  
18 MGs were labeled with the live nuclear marker Hoechst (blue) to identify individual cells followed  
19 by treatment with hSN-rodo (red). Fluorescent live cell imaging with differential interference  
20 contrast microscopy was performed over a 6 h time frame with images taken every 10 min. Here,  
21 we present selected images during the T0-T2h time point where more than 60% of iPSC-MGs  
22 engulf synapses. HSN-rodo are engulfed rapidly (white arrows highlight several phagocytic



1 iPSC-MGs) and an increase in hSN-rodo intensity is observed in individual cells indicating the  
2 uptake of hSN-rodo into acidic intracellular compartments.

3

4

5 **Additional File 7: Table S1-S6**

6 **Table S1. Demographics for *C9orf72* ALS/FTD patient and control iPSCs**

7 **Table S2. Presence of *C9orf72* HRE in iPSC and iPSC-MG cells**

8 **Table S3. List of iPSC lines used for specific experiments**

9 **Table S4. Postmortem tissue sample IDs used for bulk RNA-seq analysis from Target ALS**  
10 **collection**

11 **Table S5. *C9orf72* ALS/FTD patient demographics for tissues used for immunostaining**  
12 **staining from Target ALS collection**

13 **Table S6. List of antibodies used to stain iPSC-MG cells**

14

15 **Additional File 8: Movie S1. Time lapse live imaging of *C9orf72* ALS/FTD iPSC-MG**  
16 **engulfing and degrading human synaptoneurosomes pHrodo (hSN-rodo)**

17 Here, we present selected time lapse live cell imaging of *C9orf72* ALS/FTD iPSC-MG engulfing  
18 hSN-rodo. Fluorescent live cell imaging with differential interference contrast microscopy was  
19 performed over a 6 h time frame with images taken every 10 min. iPSC-MGs were identified  
20 using nuclear marker Hoechst (blue) followed by treatment with hSN-rodo (red). The increase in  
21 hSN-rodo intensity is observed in individual cells indicative of the uptake of hSN-rodo into acidic  
22 intracellular compartments for degradation.

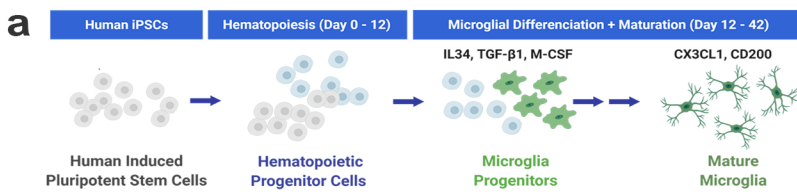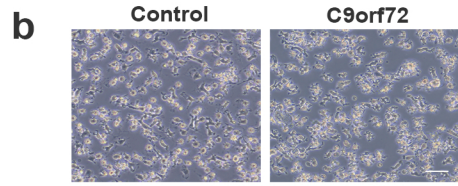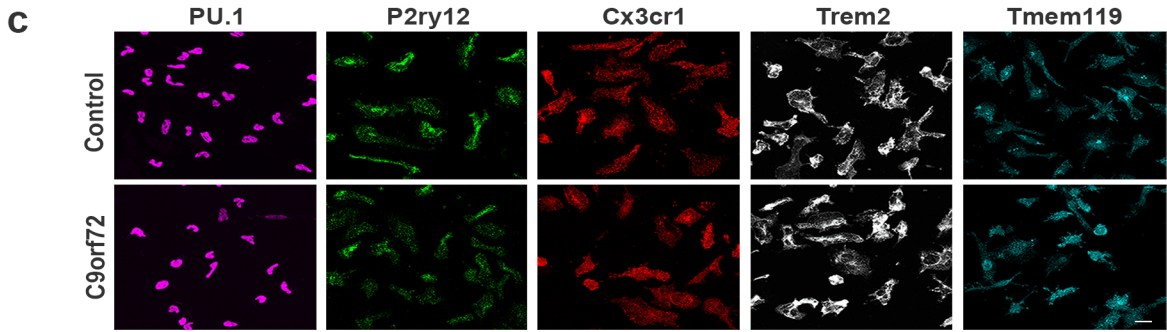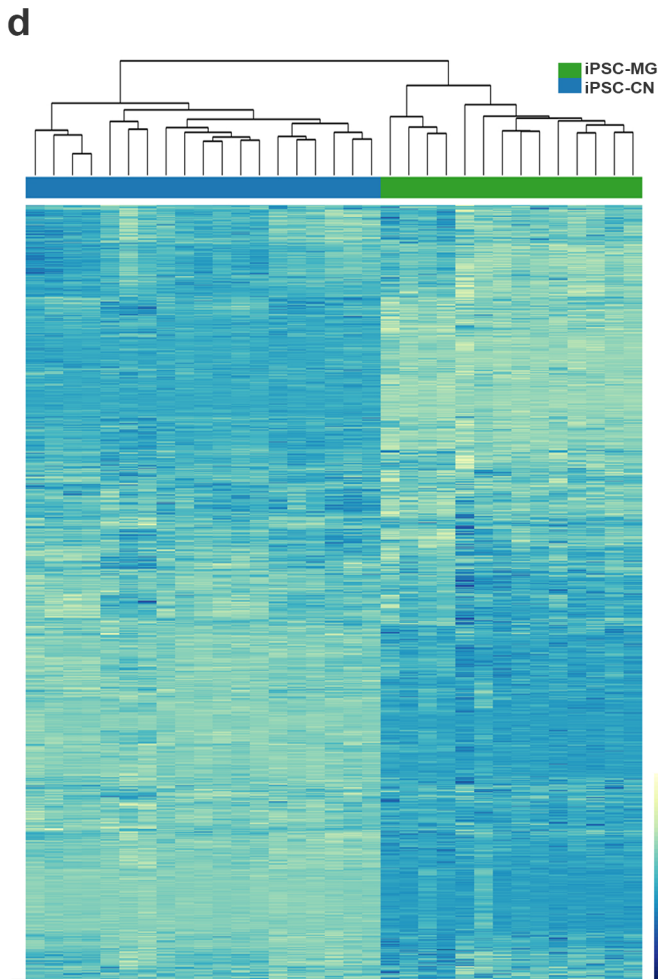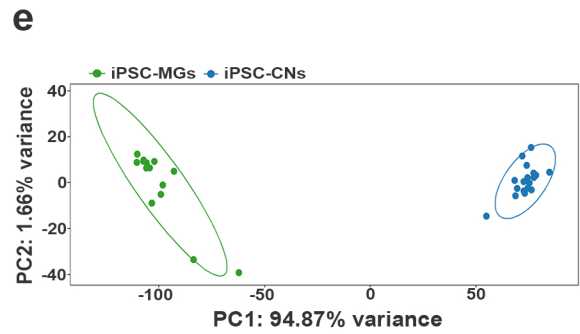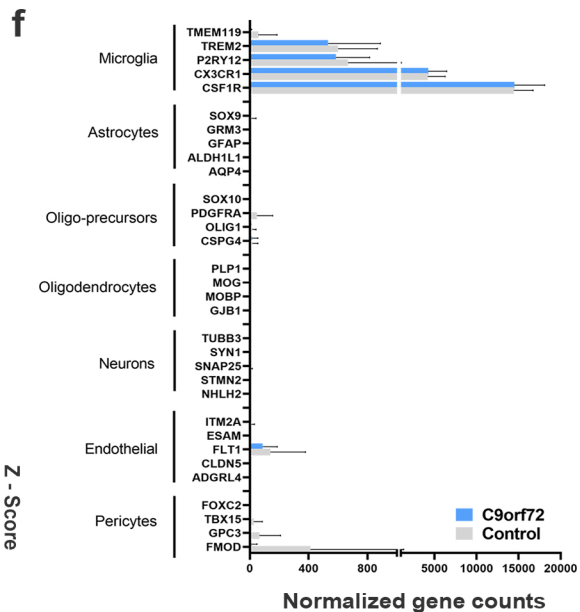

Fig 1

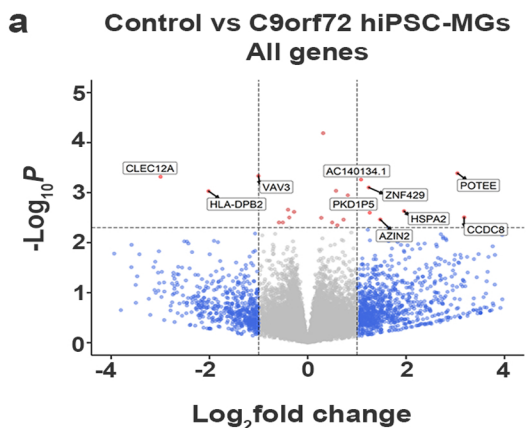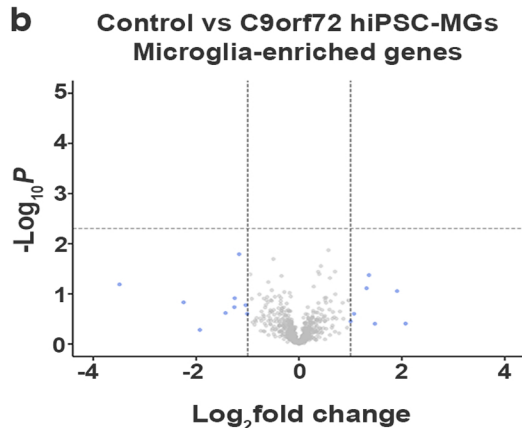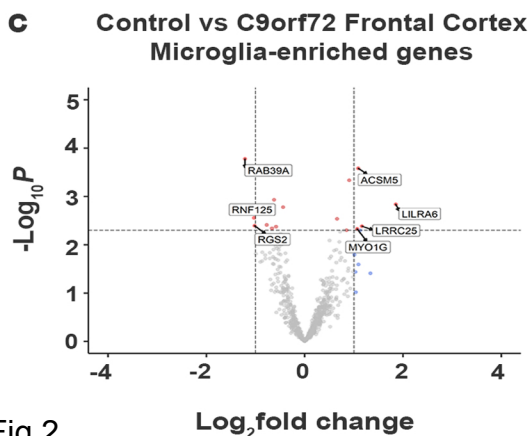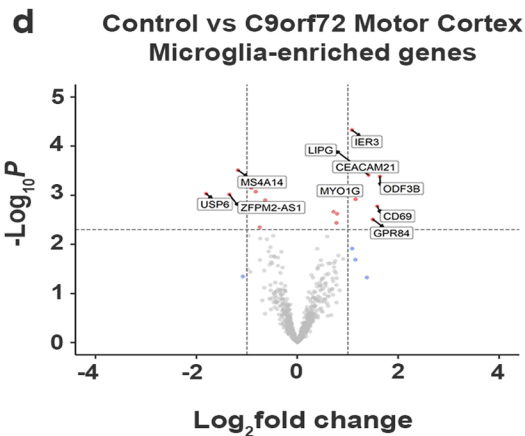

Fig 2

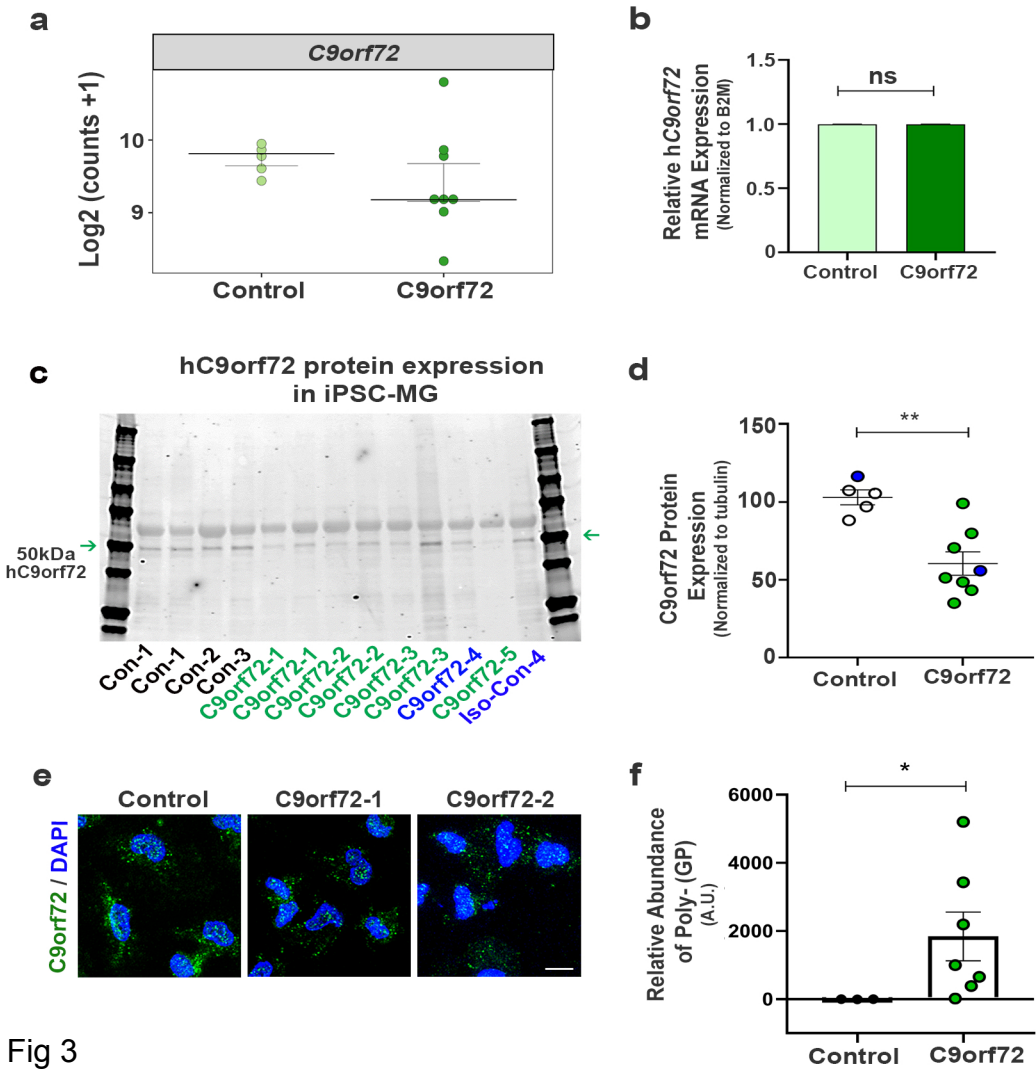

Fig 3

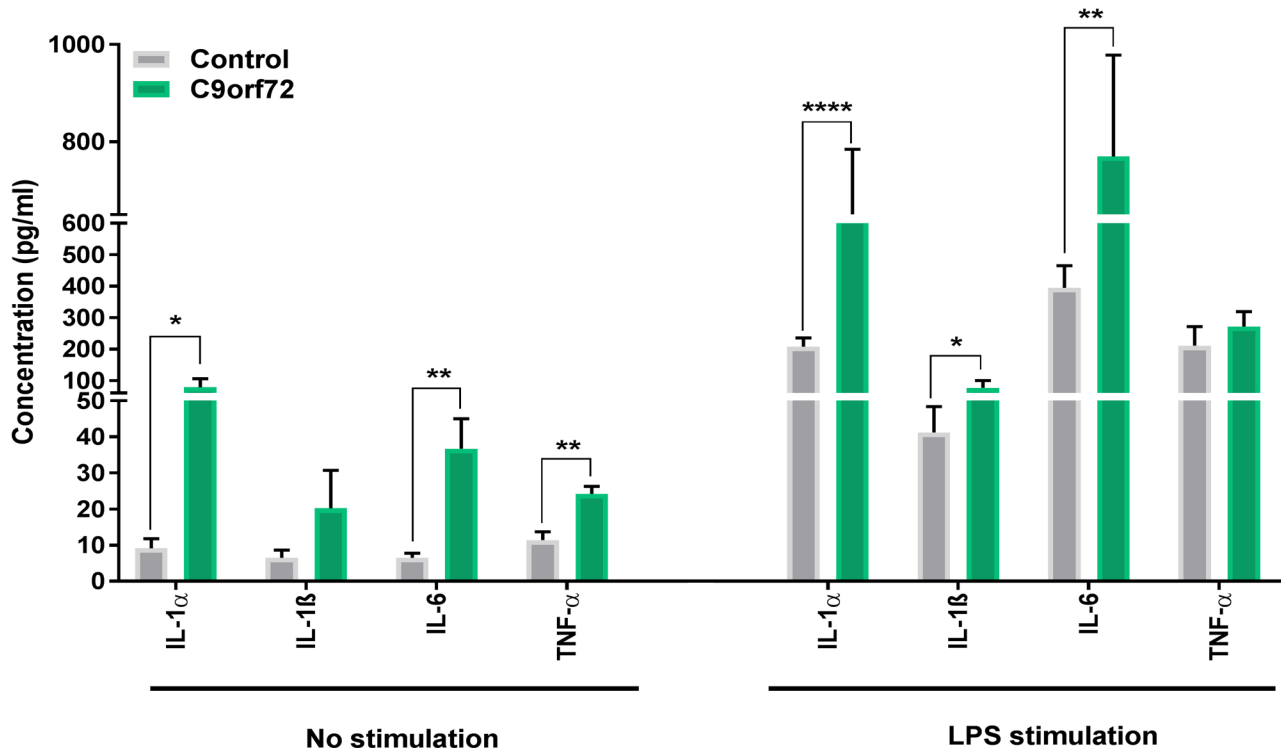

Fig 4

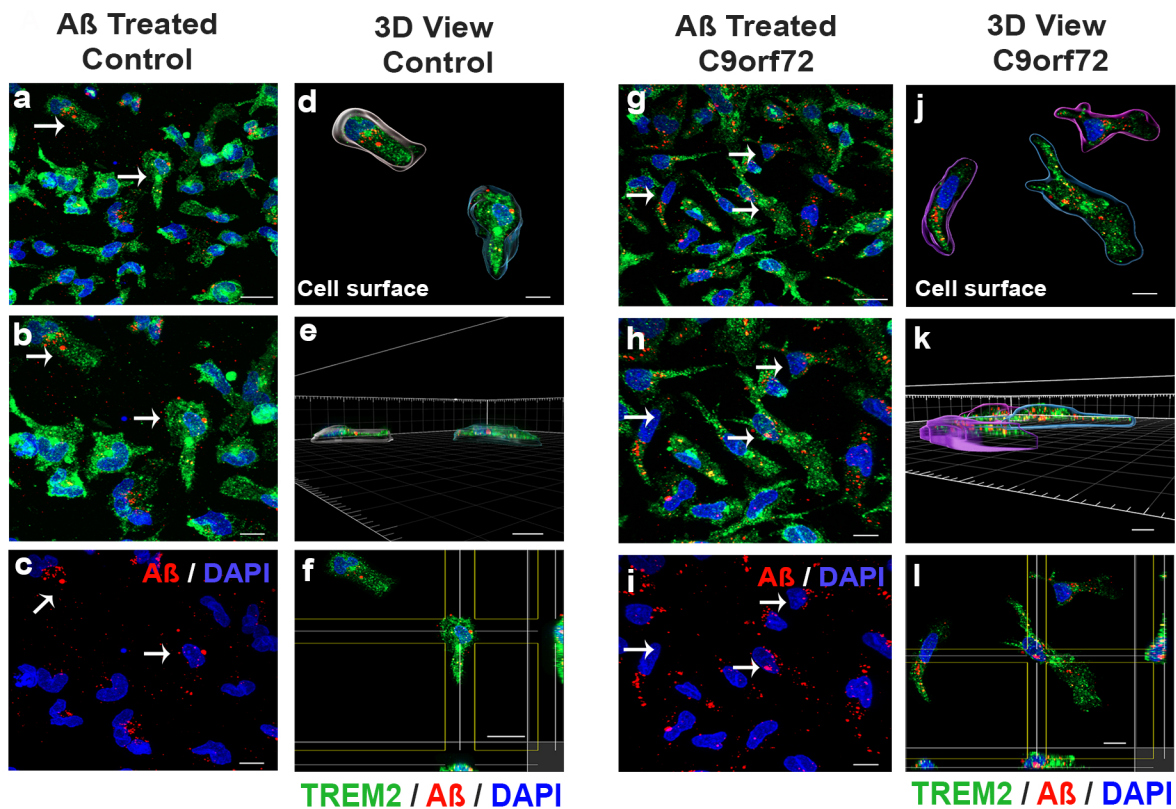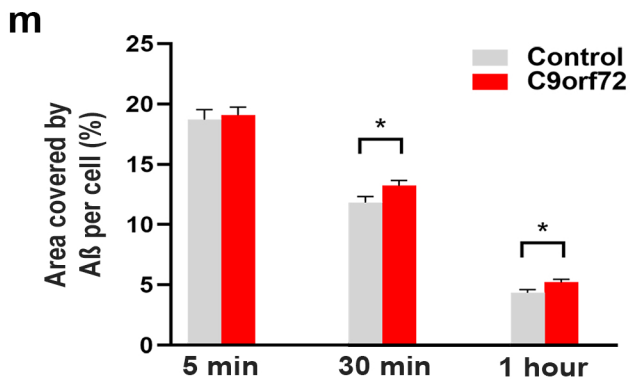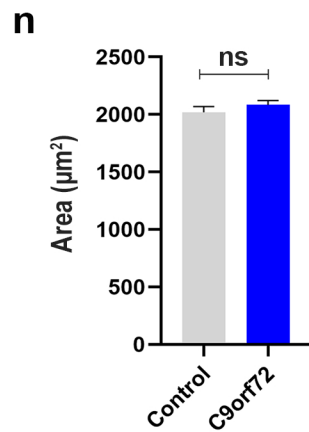

Fig 5

**a**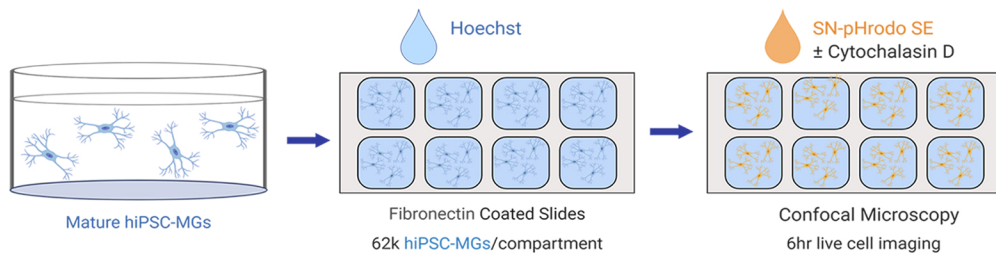**Time 0 hours****Time 2 hours**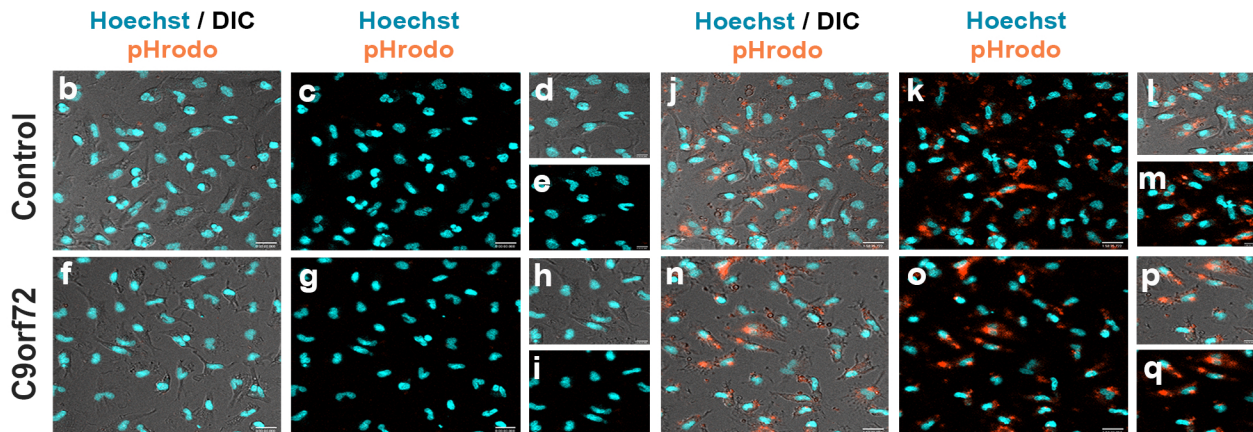**r**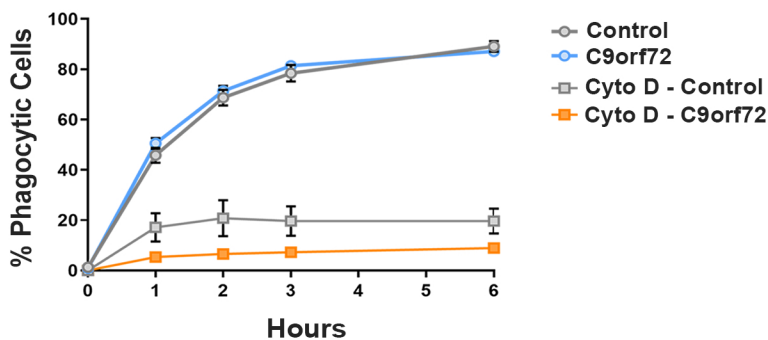**s**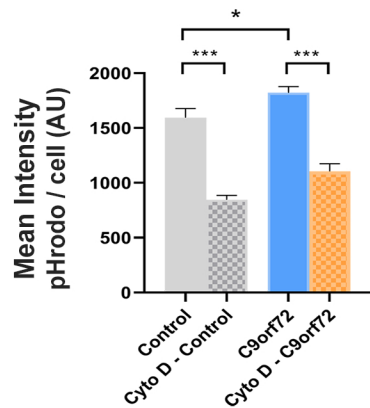

Fig 6





Frontal Cortex

Control

C9orf72

C9orf72  
Extended view

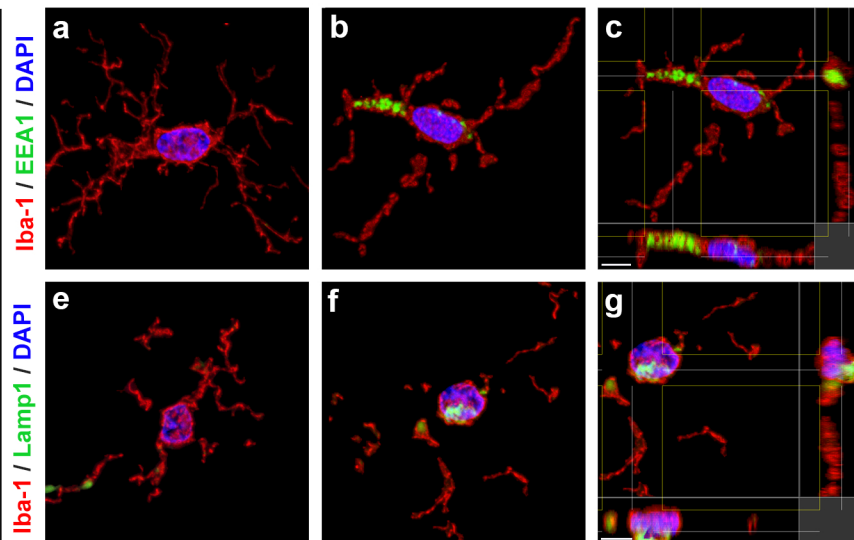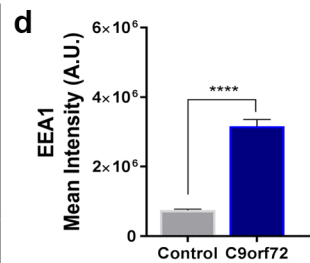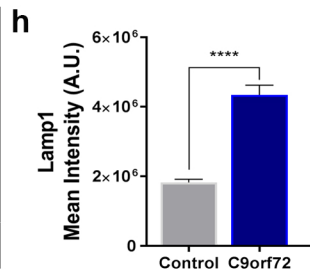

Motor Cortex

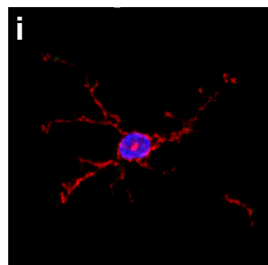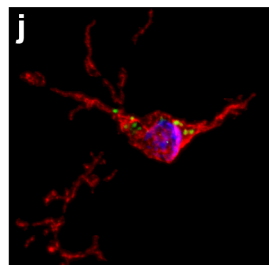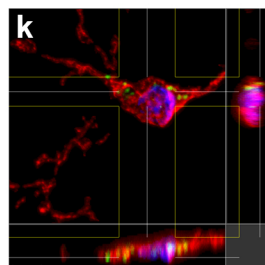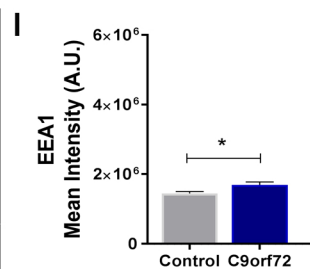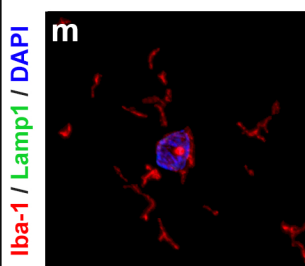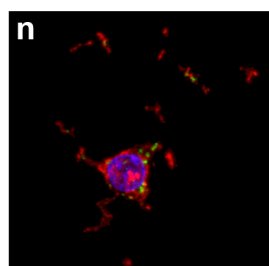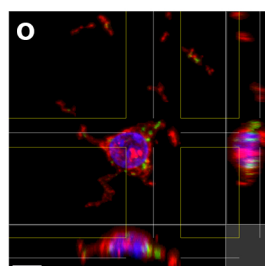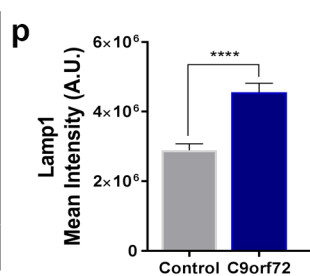

Fig 8

**a**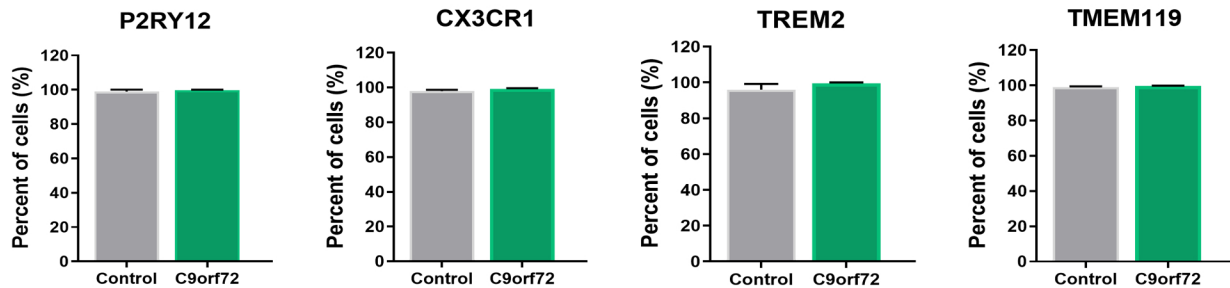**b**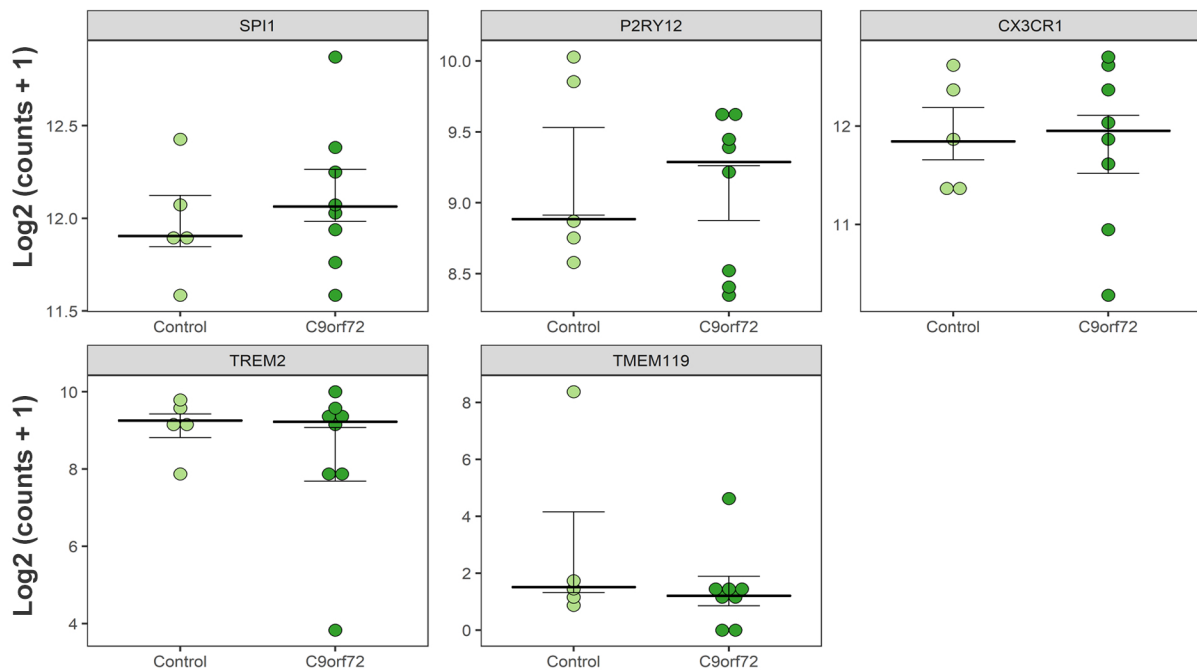

Fig S1

**a** Top differentially expressed genes in *C9orf72* ALS/FTD versus healthy control iPSC-MGs full transcriptome

| GeneID     | Mean Expression | log2FoldChange | pvalue   | Function                                                                    |
|------------|-----------------|----------------|----------|-----------------------------------------------------------------------------|
| HOGA1      | 35.99377933     | 10.02954833    | 1.02E-03 | 4-hydroxy-2-oxoglutarate aldolase 1                                         |
| SEC14L5    | 8.302217625     | 5.668051584    | 3.83E-04 | SEC14 like lipid binding 5                                                  |
| AL021068.2 | 14.37981233     | 5.25019299     | 4.75E-04 | ATP synthase 6 (MTATP6) pseudogene                                          |
| TSPAN18    | 11.22990104     | 5.232275633    | 9.32E-05 | tetraspanin 18                                                              |
| FPR3       | 32.81832265     | 4.357748152    | 6.77E-05 | formyl peptide receptor 3                                                   |
| HERC2P8    | 6.942132063     | 4.292452758    | 2.15E-04 | hect domain and RLD 2 pseudogene 8                                          |
| PRSS8      | 2.886136682     | 4.058491716    | 1.16E-03 | serine protease 8                                                           |
| CCDC8      | 52.12108214     | 3.181835055    | 3.12E-03 | coiled-coil domain containing 8                                             |
| POTEE      | 110.9768091     | 3.044353039    | 4.12E-04 | POTE ankyrin domain family member E                                         |
| HSPA2      | 12.72024179     | 1.958992029    | 2.35E-03 | heat shock protein family A (Hsp70) member 2                                |
| AZIN2      | 16.20028104     | 1.472620525    | 3.45E-03 | antizyme inhibitor 2                                                        |
| PKD1P5     | 39.83807692     | 1.259691219    | 2.52E-03 | polycystin 1, transient receptor potential channel interacting pseudogene 5 |
| ZNF429     | 43.95718957     | 1.242258356    | 7.92E-04 | zinc finger protein 429                                                     |
| AC140134.1 | 60.66923167     | 1.084736579    | 5.49E-04 | novel transcript, antisense to SMN2                                         |
| VAV3       | 333.8017886     | -1.004756607   | 4.64E-04 | vav guanine nucleotide exchange factor 3                                    |
| HLA-DPB2   | 16.03373275     | -2.017725772   | 9.35E-04 | major histocompatibility complex, class II, DP beta 2 (pseudogene)          |
| CLEC12A    | 39.05534222     | -2.992801595   | 4.80E-04 | C-type lectin domain family 12 member A                                     |
| L1TD1      | 16.48750267     | -4.129676241   | 1.21E-04 | LINE1 type transposase domain containing 1                                  |
| ALS92183.1 | 22.54644994     | -4.350844466   | 7.74E-05 | paralogue to a muscular dystrophy gene (frg1)                               |
| KCNK17     | 81.78711188     | -7.423858968   | 1.97E-04 | potassium two pore domain channel subfamily K member 17                     |

**b** Top differentially expressed microglia-enriched genes in brain regions affected by *C9orf72* ALS/FTD  
Patent tissue RNAseq from Target ALS

**Frontal Cortex**

| GeneID | Mean Expression | log2FoldChange | pvalue   | Function                                         |
|--------|-----------------|----------------|----------|--------------------------------------------------|
| ACSM5  | 65.2520943      | 1.089706576    | 2.62E-04 | acyl-CoA synthetase medium chain family member 5 |
| LILRA6 | 8.242638904     | 1.855077798    | 1.46E-03 | leukocyte immunoglobulin like receptor A6        |
| LYRC25 | 14.1927915      | 1.166641731    | 4.13E-03 | leucine rich repeat containing 25                |
| MYO1G  | 41.87188372     | 1.070172293    | 4.72E-03 | myosin IG                                        |
| RAB39A | 81.5794358      | -1.213506643   | 1.67E-04 | RAB39A, member RAS oncogene family               |
| RGS2   | 264.235745      | -1.017507335   | 4.04E-03 | regulator of G protein signaling 2               |
| RNF125 | 76.50144549     | -1.031177183   | 2.78E-03 | ring finger protein 125                          |

**Motor Cortex**

| GeneID    | Mean Expression | log2FoldChange | pvalue   | Function                            |
|-----------|-----------------|----------------|----------|-------------------------------------|
| CD69      | 14.39047314     | 1.585646223    | 1.68E-03 | CD69 molecule                       |
| CEACAM21  | 12.52373946     | 1.241529322    | 2.83E-04 | CEA cell adhesion molecule 21       |
| GPR84     | 12.81951259     | 1.500018857    | 3.11E-03 | G protein-coupled receptor 84       |
| IER3      | 37.27390214     | 1.081831413    | 4.71E-05 | immediate early response 3          |
| LIPG      | 24.75216691     | 1.411126078    | 3.90E-04 | lipase G, endothelial type          |
| MS4A14    | 55.54576753     | -1.175313395   | 3.11E-04 | membrane spanning 4-domains A14     |
| MYO1G     | 39.2124265      | 1.155664159    | 1.20E-03 | myosin IG                           |
| ODF3B     | 17.17098378     | 1.637140954    | 4.17E-04 | outer dense fiber of sperm tails 3B |
| USP6      | 15.80529876     | -1.80830343    | 9.32E-04 | ubiquitin specific peptidase 6      |
| ZFPM2-AS1 | 17.0065677      | -1.347531569   | 9.65E-04 | ZFPM2 antisense RNA 1               |

**C** Control vs *C9orf72* Occipital Cortex  
Microglia-enriched genes

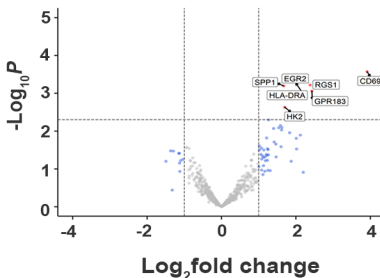

**d** Occipital Cortex

| GeneID  | Mean Expression | log2FoldChange | pvalue   | Function                                             |
|---------|-----------------|----------------|----------|------------------------------------------------------|
| CD69    | 11.11028823     | 3.914411706    | 2.71E-04 | CD69 molecule                                        |
| EGR2    | 49.22298544     | 2.163956311    | 9.37E-04 | early growth response 2                              |
| GPR183  | 18.4898987      | 2.429522603    | 8.83E-04 | G protein-coupled receptor 183                       |
| HK2     | 258.2353303     | 1.702312412    | 2.36E-03 | hexokinase 2                                         |
| HLA-DRA | 212.4528805     | 1.860607336    | 1.39E-03 | major histocompatibility complex, class II, DR alpha |
| RGS1    | 146.5013827     | 2.383177621    | 6.07E-04 | regulator of G protein signaling 1                   |
| SPP1    | 3323.737197     | 1.671517957    | 6.38E-04 | secreted phosphoprotein 1                            |

Fig S2

# Top differentially expressed genes from complete transcriptome of *C9orf72* ALS/FTD patient tissue versus healthy control

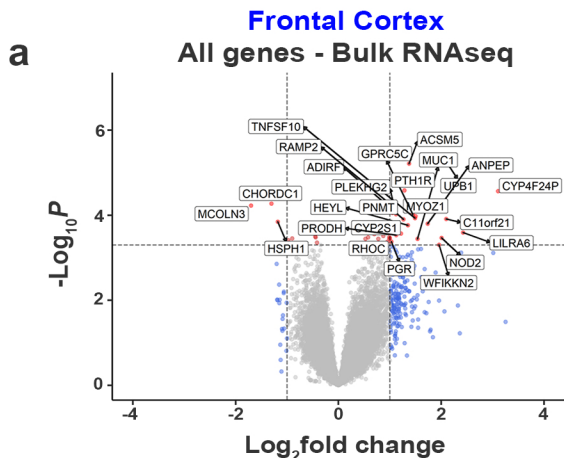

| GeneID   | Mean Expression | log2FoldChange | pvalue   | Function                                                          |
|----------|-----------------|----------------|----------|-------------------------------------------------------------------|
| ACSM5    | 68.12888197     | 1.373696141    | 6.11E-06 | acyl-CoA synthetase medium chain family member 5                  |
| UPB1     | 14.47883617     | 2.140602571    | 6.57E-06 | beta-ureidopropionase 1                                           |
| PTH1R    | 143.2963167     | 1.285612142    | 2.62E-05 | parathyroid hormone 1 receptor                                    |
| CYP4F24P | 18.92983176     | 3.107071242    | 2.71E-05 | cytochrome P450 family 4 subfamily F member 24, pseudogene        |
| CHORDC1  | 1690.20189      | -1.30139591    | 5.33E-05 | cysteine and histidine rich domain containing 1                   |
| MCOLN3   | 12.78944298     | -1.699498265   | 5.94E-05 | mucopolin 3                                                       |
| RAMP2    | 32.25448123     | 1.09412786     | 6.76E-05 | receptor activity modifying protein 2                             |
| PNMT     | 43.82179614     | 1.049248911    | 8.83E-05 | phenylethanolamine N-methyltransferase                            |
| PLEKHG2  | 88.19394237     | 1.118928092    | 9.54E-05 | pleckstrin homology and RhoGEF domain containing G2               |
| GPRC5C   | 121.5717407     | 1.448077342    | 9.72E-05 | G protein-coupled receptor class C group 5 member C               |
| MYOZ1    | 11.26405499     | 1.500475718    | 1.06E-04 | myozenin 1                                                        |
| TNFSF10  | 47.69956595     | 1.490896485    | 1.18E-04 | TNF superfamily member 10                                         |
| C11orf21 | 16.84168556     | 2.095358277    | 1.23E-04 | chromosome 11 open reading frame 21                               |
| ADIRF    | 197.0590585     | 1.267162951    | 1.26E-04 | adipogenesis regulatory factor                                    |
| HSPH1    | 5083.178638     | -1.18017007    | 1.42E-04 | heat shock protein family H (Hsp110) member 1                     |
| ANPEP    | 23.01343049     | 1.737089039    | 1.58E-04 | alanil aminopeptidase, membrane                                   |
| HEYL     | 85.64350354     | 1.354272338    | 1.72E-04 | hes related family bHLH transcription factor with YRPW motif like |
| LILRA6   | 10.24372236     | 2.424695542    | 2.56E-04 | leukocyte immunoglobulin like receptor A6                         |
| CYP251   | 14.890158       | 1.212656243    | 2.71E-04 | cytochrome P450 family 2 subfamily 5 member 1                     |
| PRODH    | 1383.260451     | 1.124011128    | 2.93E-04 | proline dehydrogenase 1                                           |

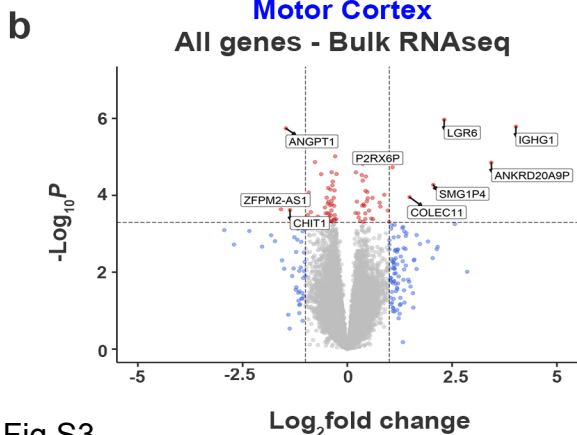

| GeneID     | Mean Expression | log2FoldChange | fcSE     | pvalue   | Function                                                    |
|------------|-----------------|----------------|----------|----------|-------------------------------------------------------------|
| LGR6       | 32.9179496      | 2.314623327    | 0.474599 | 1.08E-06 | leucine rich repeat containing G protein-coupled receptor 6 |
| IGHG1      | 13.15030401     | 4.023116643    | 0.839139 | 1.63E-06 | immunoglobulin heavy constant gamma 1 (G1m marker)          |
| ANGPT1     | 135.674109      | -1.462922571   | 0.30652  | 1.82E-06 | angiotensin 1                                               |
| ANKRD20A9P | 15.8352823      | 3.43383058     | 0.790833 | 1.41E-05 | ankyrin repeat domain 20 family member A9, pseudogene       |
| P2RX6P     | 33.22564559     | 1.080468933    | 0.252412 | 1.86E-05 | purinergic receptor P2X 6 pseudogene                        |
| SMG1P4     | 31.88047041     | 2.049123316    | 0.507014 | 5.31E-05 | SMG1 pseudogene 4                                           |
| COLEC11    | 25.33189606     | 1.484945093    | 0.384307 | 1.12E-04 | collectin subfamily member 11                               |
| ZFPM2-AS1  | 18.29770547     | -1.587667615   | 0.431019 | 2.30E-04 | ZFPM2 antisense RNA 1                                       |
| CHIT1      | 20.60728413     | -1.369519087   | 0.3729   | 2.40E-04 | chitinase 1                                                 |
| CXCL11     | 9.4661815       | 2.563451188    | 0.743041 | 5.61E-04 | C-X-C motif chemokine ligand 11                             |
| FAAH1      | 22.50310124     | 1.124049813    | 0.327082 | 5.89E-04 | fatty acid amide hydrolase pseudogene 1                     |
| IER3       | 39.26479111     | 1.061020716    | 0.309023 | 5.96E-04 | immediate early response 3                                  |

Fig S3

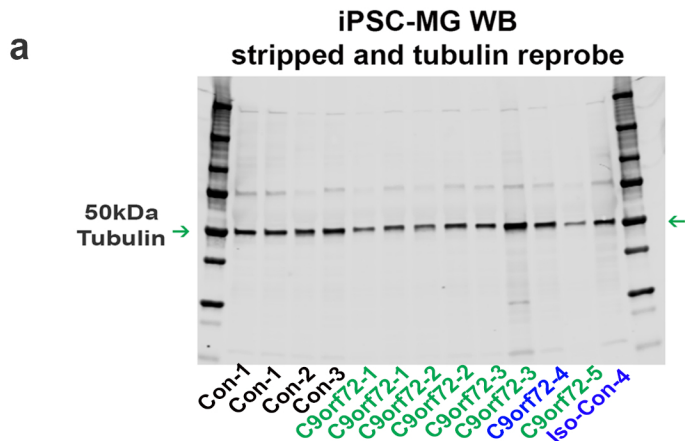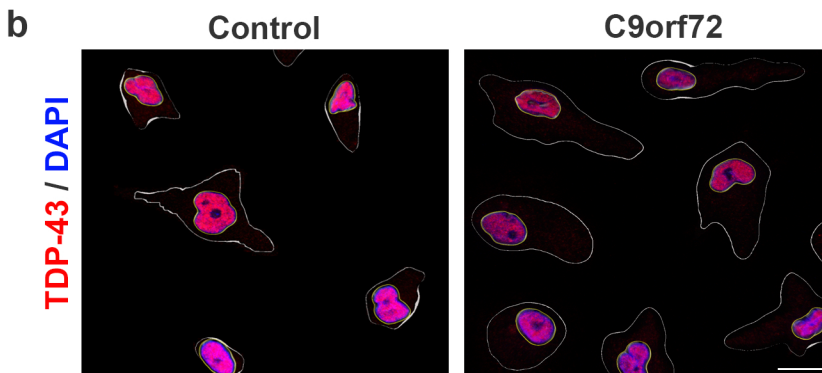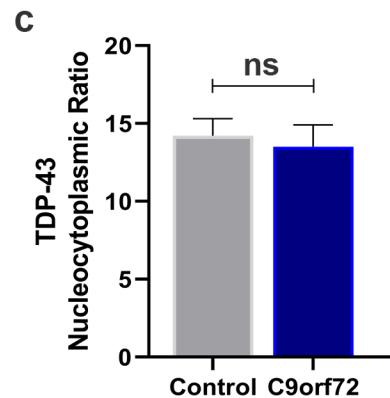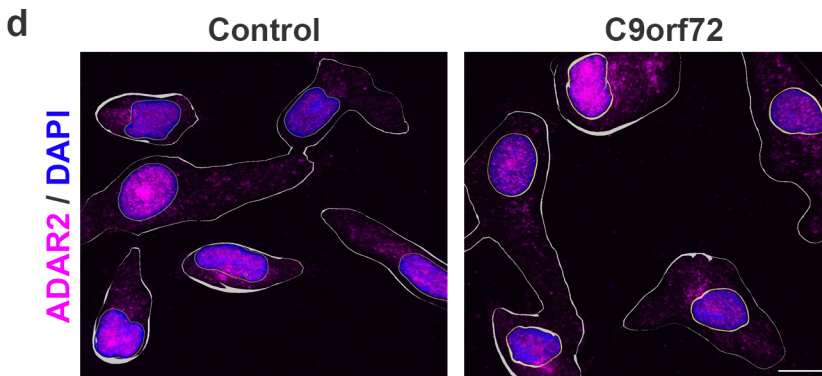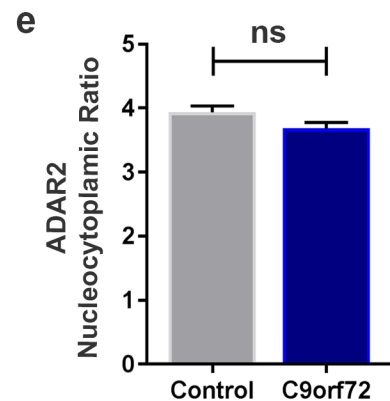

Fig S4

**a** **Synaptoneurosomes**  
Synaptic enrichment

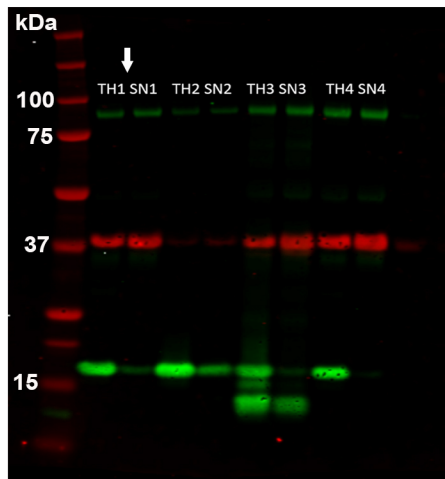

**b**

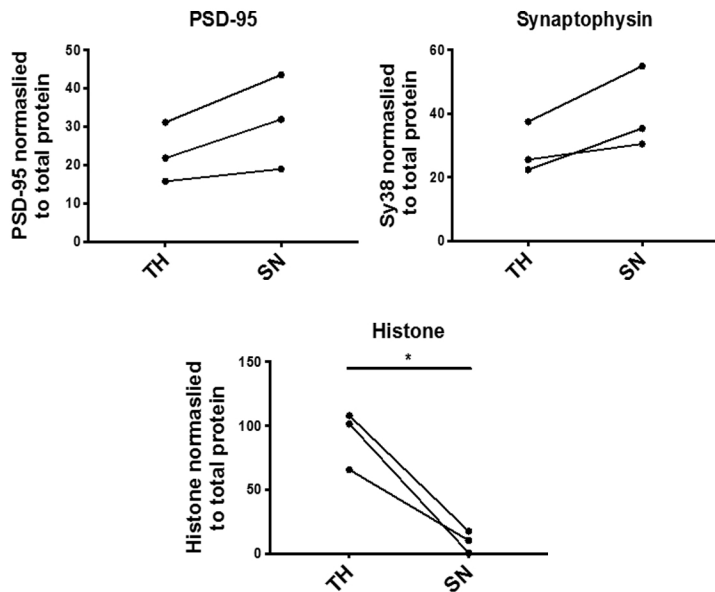

Fig S5

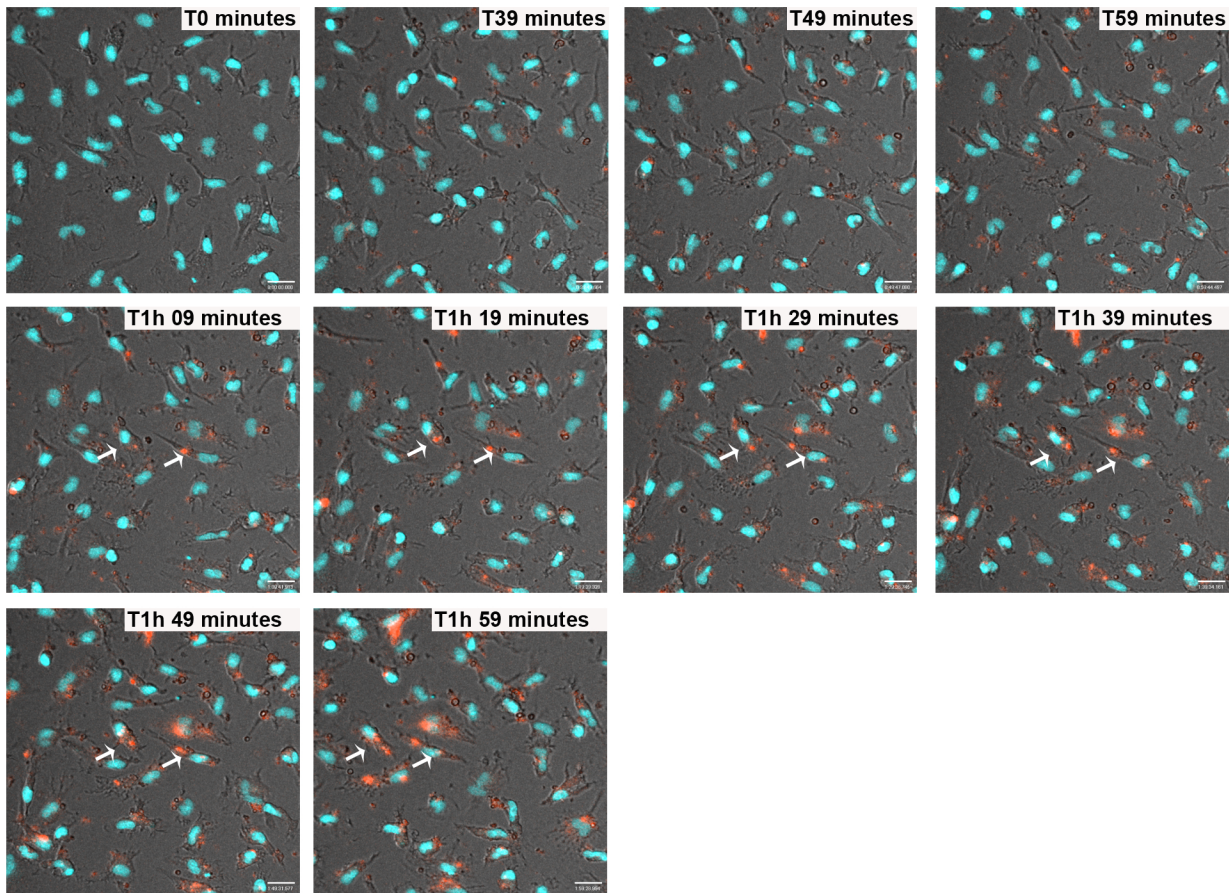

Fig S6

## Additional File 7: Tables S1-S6

**Table S1. Demographics for *C9orf72* ALS/FTD patient and healthy control iPSCs**

| iPSC line   | Gene Mutation    | C9 Expansion Size | Gender | Age at disease onset (yrs) | Age at biopsy/blood draw (yrs) | Age at death (yrs) | Disease duration (yrs) | Comments                              |
|-------------|------------------|-------------------|--------|----------------------------|--------------------------------|--------------------|------------------------|---------------------------------------|
| C9orf72 -1  | <i>C9orf72</i>   | >30 repeats       | Female | 60                         | 63                             | N/A                | N/A                    |                                       |
| C9orf72 -2  | <i>C9orf72</i>   | >30 repeats       | Female | 50                         | 51                             | 52                 | 2                      |                                       |
| C9orf72 -3  | <i>C9orf72</i>   | >30 repeats       | *      | *                          | *                              | N/A                | N/A                    | Almeida et al, Acta Neuropathol, 2013 |
| C9orf72 -4  | <i>C9orf72</i>   | >30 repeats       | *      | *                          | *                              | N/A                | N/A                    | Lopez-Gonzalez et al, Neuron, 2016    |
| C9orf72 -5  | <i>C9orf72</i>   | >30 repeats       | *      | *                          | *                              | N/A                | N/A                    | Almeida et al, Acta Neuropathol, 2013 |
| C9orf72 -6  | <i>C9orf72</i>   | >30 repeats       | Male   | 52                         | 58                             | N/A                | N/A                    |                                       |
| C9orf72 -7  | <i>C9orf72</i>   | >30 repeats       | Male   | 48                         | 51                             | 59                 | 11                     |                                       |
| C9orf72 -8  | <i>C9orf72</i>   | >30 repeats       | Male   | 57                         | 58                             | 59                 | 1.7                    |                                       |
| Control 1   | Control          | N/A               | Female | N/A                        | N/A                            | N/A                | N/A                    |                                       |
| Control 2   | Control          | N/A               | Male   | N/A                        | N/A                            | N/A                | N/A                    |                                       |
| Control 3   | Control          | N/A               | Male   | N/A                        | N/A                            | N/A                | N/A                    |                                       |
| • Control 4 | Isogenic Control | N/A               | *      | *                          | *                              | N/A                | N/A                    |                                       |
| Control 5   | Control          | N/A               | Female | N/A                        | N/A                            | N/A                | N/A                    |                                       |
| Control 6   | Control          | N/A               | Male   | N/A                        | N/A                            | N/A                | N/A                    |                                       |

\* - this information is not provided to protect the ID of the donors

• C9orf72-4 isogenic pair

**Table S2. Presence of *C9orf72* HRE in iPSC and iPSC-MG cells**

| Cell Line | Gene mutation    | Cell Type | Repeat primed PCR |
|-----------|------------------|-----------|-------------------|
|           |                  |           | C9 HRE (>30)      |
| C9orf72-1 | <i>C9orf72</i>   | iPSC      | Yes               |
|           |                  | iPSC-MG   | Yes               |
| C9orf72-2 | <i>C9orf72</i>   | iPSC      | Yes               |
|           |                  | iPSC-MG   | Yes               |
| C9orf72-3 | <i>C9orf72</i>   | iPSC      | Yes               |
|           |                  | iPSC-MG   | Yes               |
| C9orf72-4 | <i>C9orf72</i>   | iPSC      | Yes               |
|           |                  | iPSC-MG   | Yes               |
| C9orf72-5 | <i>C9orf72</i>   | iPSC      | not determined    |
|           |                  | iPSC-MG   | not determined    |
| C9orf72-6 | <i>C9orf72</i>   | iPSC      | Yes               |
|           |                  | iPSC-MG   | Yes               |
| C9orf72-7 | <i>C9orf72</i>   | iPSC      | Yes               |
|           |                  | iPSC-MG   | not determined    |
| C9orf72-8 | <i>C9orf72</i>   | iPSC      | not determined    |
|           |                  | iPSC-MG   | not determined    |
| Control 1 | Control          | iPSC      | No                |
|           |                  | iPSC-MG   | No                |
| Control 2 | Control          | iPSC      | not determined    |
|           |                  | iPSC-MG   | not determined    |
| Control 3 | Control          | iPSC      | No                |
|           |                  | iPSC-MG   | No                |
| Control 4 | Isogenic Control | iPSC      | No                |
|           |                  | iPSC-MG   | No                |
| Control 5 | Control          | iPSC      | not determined    |
|           |                  | iPSC-MG   | not determined    |
| Control 6 | Control          | iPSC      | No                |
|           |                  | iPSC-MG   | not determined    |



**Table S3. List of iPSC lines used for specific experiments**

| Cell Line | Gene mutation   | RNAseq | MG markers | C9 HRE (>30) | qPCR - hC9 | C9 Protein | Poly (GP) | TDP-43 ADAR2 | Cytokine Analysis | Phagocytic Activity A $\beta$ 1-40 TAMRA | hSN Assay hSN-rodo | EAA1/Lamp1 Basal Conditions |
|-----------|-----------------|--------|------------|--------------|------------|------------|-----------|--------------|-------------------|------------------------------------------|--------------------|-----------------------------|
| C9orf72-1 | C9orf72         | √      | √          | √            | √          | √          | √         | √            | √                 | √                                        | √                  | √                           |
| C9orf72-2 | C9orf72         | √      | √          | √            | √          | √          | √         | √            | √                 | √                                        | √                  | √                           |
| C9orf72-3 | C9orf72         | √      | √          | √            | √          | √          | √         | √            | √                 | √                                        | √                  | √                           |
| C9orf72-4 | C9orf72         | √      | √          | √            | √          | √          | √         | √            | √                 | √                                        | √                  | √                           |
| C9orf72-5 | C9orf72         | √      | √          | √            | √          | √          | √         | √            | √                 | √                                        | √                  | √                           |
| C9orf72-6 | C9orf72         | √      | √          | √            | √          | √          | √         | √            | √                 | √                                        | √                  | √                           |
| C9orf72-7 | C9orf72         | √      | √          | √            | √          | √          | √         | √            | √                 | √                                        | √                  | √                           |
| C9orf72-8 | C9orf72         | √      | √          | √            | √          | √          | √         | √            | √                 | √                                        | √                  | √                           |
| Control 1 | Control         | √      | √          | No           | √          | √          | √         | √            | √                 | √                                        | √                  | √                           |
| Control 2 | Control         | √      | √          | No           | √          | √          | √         | √            | √                 | √                                        | √                  | √                           |
| Control 3 | Control         | √      | √          | No           | √          | √          | √         | √            | √                 | √                                        | √                  | √                           |
| Control 4 | IsogenicControl | √      | √          | No           | √          | √          | √         | √            | √                 | √                                        | √                  | √                           |
| Control 5 | Control         | √      | √          | No           | √          | √          | √         | √            | √                 | √                                        | √                  | √                           |
| Control 6 | Control         | √      | √          | No           | √          | √          | √         | √            | √                 | √                                        | √                  | √                           |

**Table S4. Postmortem tissue sample IDs used for bulk RNAseq analysis from Target ALS collection**

**Motor Cortex**

**Frontal Cortex**

**Occipital Cortex**

| ID             | Tissue of Origin | Classification |
|----------------|------------------|----------------|
| CGND-HRA-00251 | Cortex_Motor     | Control        |
| CGND-HRA-00218 | Cortex_Motor     | Control        |
| CGND-HRA-00590 | Cortex_Motor     | Control        |
| CGND-HRA-00224 | Cortex_Motor     | Control        |
| CGND-HRA-00654 | Cortex_Motor     | Control        |
| CGND-HRA-00569 | Cortex_Motor     | Control        |
| CGND-HRA-00595 | Cortex_Motor     | Control        |
| CGND-HRA-00091 | Cortex_Motor     | Control        |
| CGND-HRA-00568 | Cortex_Motor     | Control        |
| CGND-HRA-00063 | Cortex_Motor     | Control        |
| CGND-HRA-01186 | Cortex_Motor     | Control        |
| CGND-HRA-00594 | Cortex_Motor     | Control        |
| CGND-HRA-00655 | Cortex_Motor     | Control        |
| CGND-HRA-00596 | Cortex_Motor     | Control        |
| CGND-HRA-01187 | Cortex_Motor     | Control        |
|                |                  | 15             |

|                |              |       |
|----------------|--------------|-------|
| CGND-HRA-00134 | Cortex_Motor | C9ALS |
| CGND-HRA-00631 | Cortex_Motor | C9ALS |
| CGND-HRA-00358 | Cortex_Motor | C9ALS |
| CGND-HRA-00321 | Cortex_Motor | C9ALS |
| CGND-HRA-00287 | Cortex_Motor | C9ALS |
| CGND-HRA-00286 | Cortex_Motor | C9ALS |
| CGND-HRA-00359 | Cortex_Motor | C9ALS |
| CGND-HRA-00254 | Cortex_Motor | C9ALS |
| CGND-HRA-00320 | Cortex_Motor | C9ALS |
| CGND-HRA-00288 | Cortex_Motor | C9ALS |
| CGND-HRA-00088 | Cortex_Motor | C9ALS |
| CGND-HRA-00060 | Cortex_Motor | C9ALS |
|                |              | 12    |

| ID             | Tissue of Origin | Classification |
|----------------|------------------|----------------|
| CGND-HRA-01179 | Cortex_Frontal   | Control        |
| CGND-HRA-00212 | Cortex_Frontal   | Control        |
| CGND-HRA-01379 | Cortex_Frontal   | Control        |
| CGND-HRA-00751 | Cortex_Frontal   | Control        |
| CGND-HRA-00021 | Cortex_Frontal   | Control        |
| CGND-HRA-00476 | Cortex_Frontal   | Control        |
| CGND-HRA-01236 | Cortex_Frontal   | Control        |
| CGND-HRA-00242 | Cortex_Frontal   | Control        |
| CGND-HRA-01225 | Cortex_Frontal   | Control        |
| CGND-HRA-00529 | Cortex_Frontal   | Control        |
| CGND-HRA-01234 | Cortex_Frontal   | Control        |
| CGND-HRA-01228 | Cortex_Frontal   | Control        |
| CGND-HRA-00466 | Cortex_Frontal   | Control        |
| CGND-HRA-01185 | Cortex_Frontal   | Control        |
| CGND-HRA-00788 | Cortex_Frontal   | Control        |
| CGND-HRA-00871 | Cortex_Frontal   | Control        |
|                |                  | 16             |

|                |                |       |
|----------------|----------------|-------|
| CGND-HRA-00018 | Cortex_Frontal | C9ALS |
| CGND-HRA-00245 | Cortex_Frontal | C9ALS |
| CGND-HRA-00362 | Cortex_Frontal | C9ALS |
| CGND-HRA-00550 | Cortex_Frontal | C9ALS |
| CGND-HRA-00323 | Cortex_Frontal | C9ALS |
| CGND-HRA-00244 | Cortex_Frontal | C9ALS |
| CGND-HRA-00248 | Cortex_Frontal | C9ALS |
| CGND-HRA-00460 | Cortex_Frontal | C9ALS |
|                |                | 8     |

| ID             | Tissue of Origin | Classification |
|----------------|------------------|----------------|
| CGND-HRA-01204 | Cortex_Occipital | Control        |
| CGND-HRA-01343 | Cortex_Occipital | Control        |
| CGND-HRA-01235 | Cortex_Occipital | Control        |
| CGND-HRA-00567 | Cortex_Occipital | Control        |
|                |                  | 4              |

|                |                  |       |
|----------------|------------------|-------|
| CGND-HRA-00551 | Cortex_Occipital | C9ALS |
| CGND-HRA-01337 | Cortex_Occipital | C9ALS |
| CGND-HRA-00363 | Cortex_Occipital | C9ALS |
| CGND-HRA-00540 | Cortex_Occipital | C9ALS |
| CGND-HRA-00324 | Cortex_Occipital | C9ALS |
|                |                  | 5     |

**Table S5. C9orf72 ALS/FTD patient demographics for tissues used for immunostaining from Target ALS collection**

| ID  | Genotype | R/G   | DOD | Age of onset | Site of onset | Diagnosis  | Cause of death                              |
|-----|----------|-------|-----|--------------|---------------|------------|---------------------------------------------|
| 86  | C9orf72  | WM    | 74  | 67           | Cognitive     | FTD + fALS |                                             |
| 88  | C9orf72  | WM    | 59  | 57           | Bulbar        | FTD + fALS |                                             |
| 100 | Control  | ASN/F | 52  | N/A          | N/A           | N/A        | Cardiac arrest                              |
| 110 | Control  | M     | 50  | N/A          | N/A           | N/A        | hypertensive vasculopathy, hypoxia/ischemia |

\*R/G – Race and gender; \*DOD – Date of death

**Table S6. List of antibodies used to stained iPSC-MG cells**

| Antibodies   | Source                       | Catalog Number | Concentration |
|--------------|------------------------------|----------------|---------------|
| Anti- PU.1   | Cell Signaling Technologies  | 2266S          | 1:500         |
| Anti-P2ry12  | Sigma                        | HPA014518      | 1:500         |
| Anti-CX3CR1  | Biorad/AbD Serotec           | AHP1589        | 1:500         |
| Anti-Trem2   | Abcam                        | ab209814       | 1:500         |
| Anti-Tmem119 | Abcam                        | ab185333       | 1:100         |
| Anti-C9orf72 | Sigma                        | HPA023873      | 1:100         |
| Anti-TDP-43  | Cell Signaling Technologies  | 89789 -D9R3L   | 1:500         |
| Anti- ADAR2  | Sigma                        | HPA018277      | 1:500         |
| Anti-EEA1    | BD Biosciences               | 610457         | 1:700         |
| Anti-Lamp1   | Developmental Hybridoma Bank | H4A3-s         | 1:100         |
